# Supplementary material for: Practical and Metal-Free Synthesis of Novel Enantiopure Amides Containing the Potentially Bioactive 5-Nitroimidazole Moiety
Source: MDPI journal article supplement (doi:10.3390/molecules21111472), 2016-11-04
Supplement: s1 [file s1]

# Supplementary Materials: Practical and Metal-Free Synthesis of Novel Enantiopure Amides Containing the Potentially Bioactive 5-Nitroimidazole Moiety

Cédric Spitz, Fanny Mathias, Alain Gamal Giulio-Tonolo, Thierry Terme and Patrice Vanelle

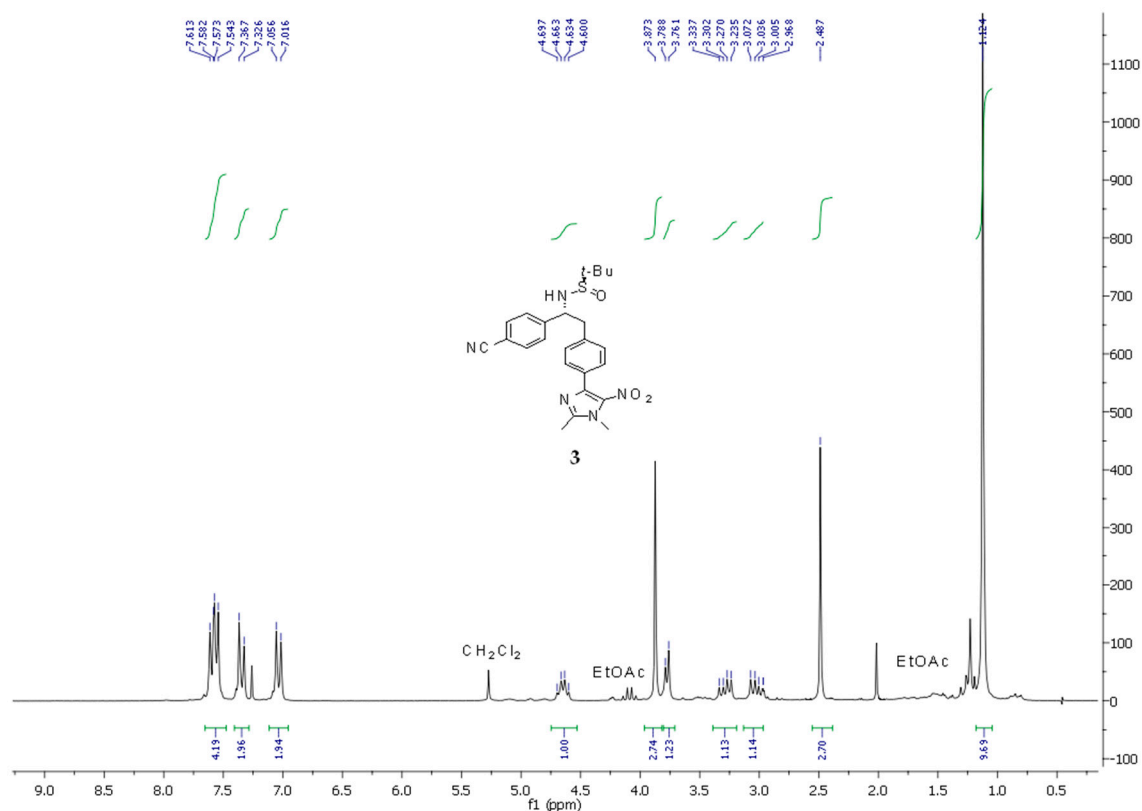

Figure S1. <sup>1</sup>H spectra of **3**.

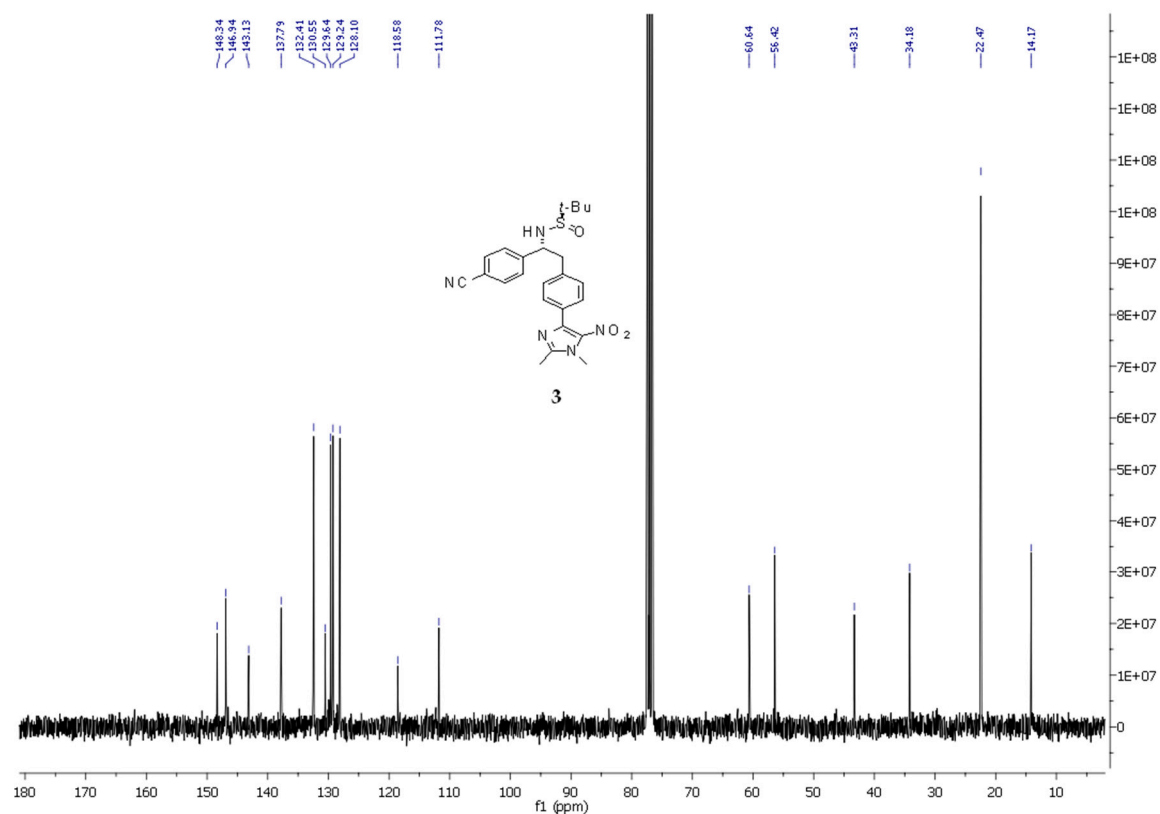Figure S2. <sup>13</sup>C-NMR spectra of 3.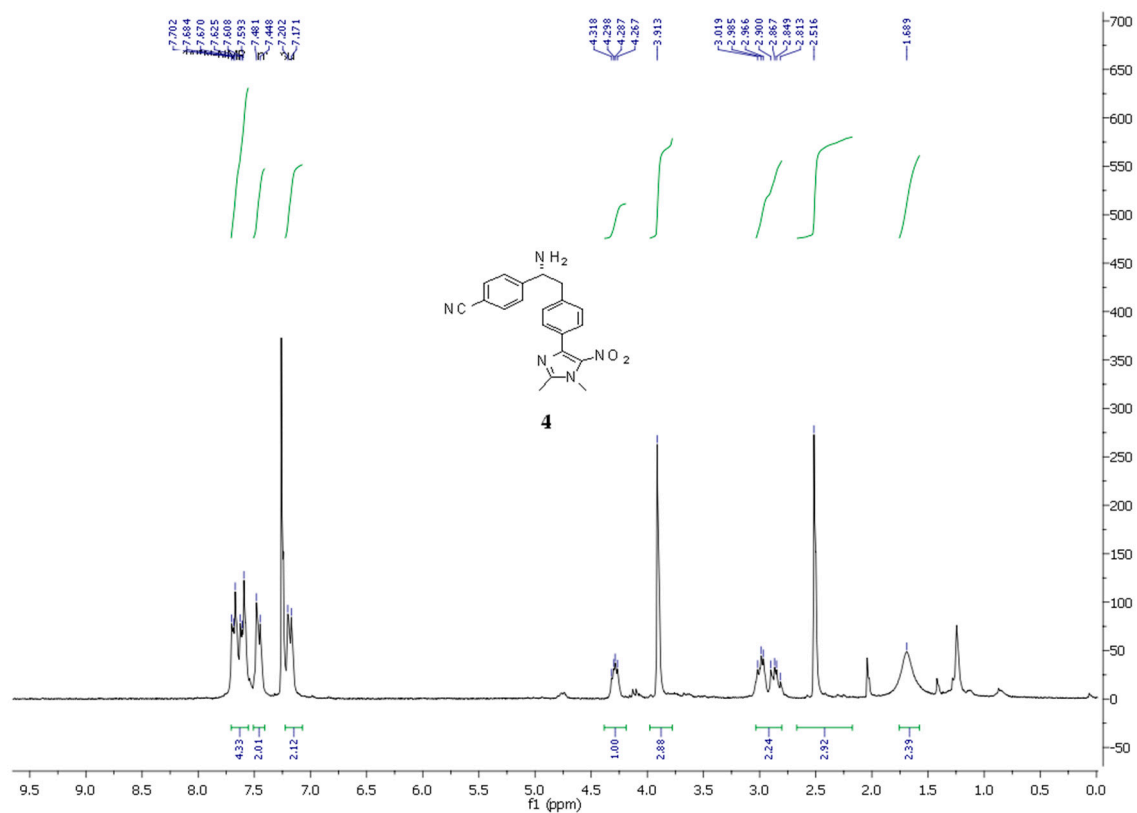Figure S3. <sup>1</sup>H-NMR spectra of 4.

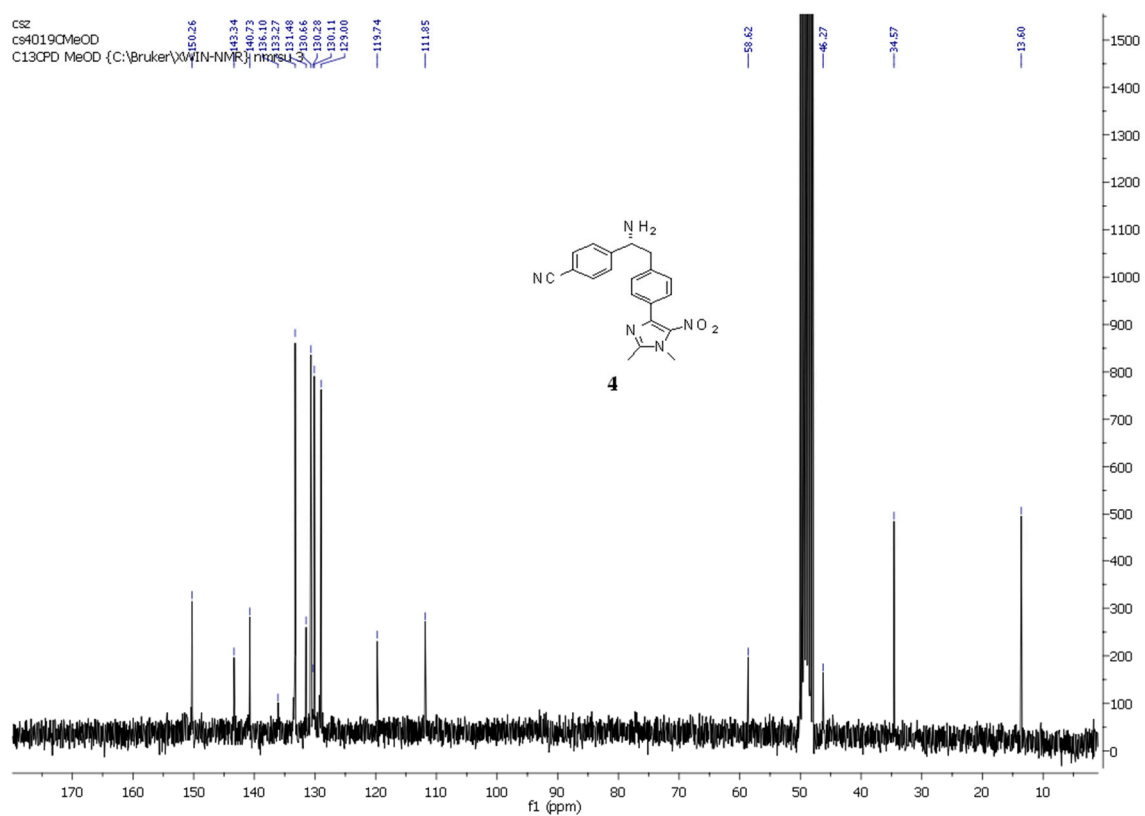Figure S4.  $^{13}\text{C}$ -NMR spectra of **4**.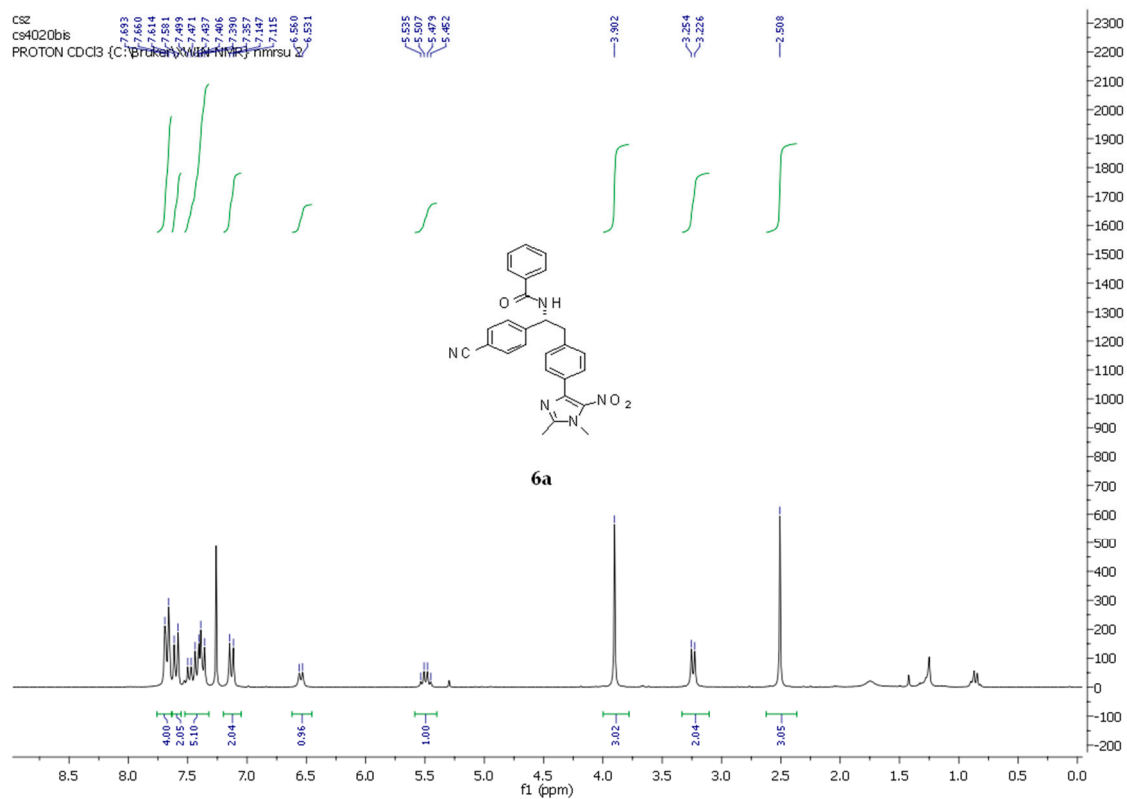Figure S5.  $^1\text{H}$ -NMR spectra of **6a**.

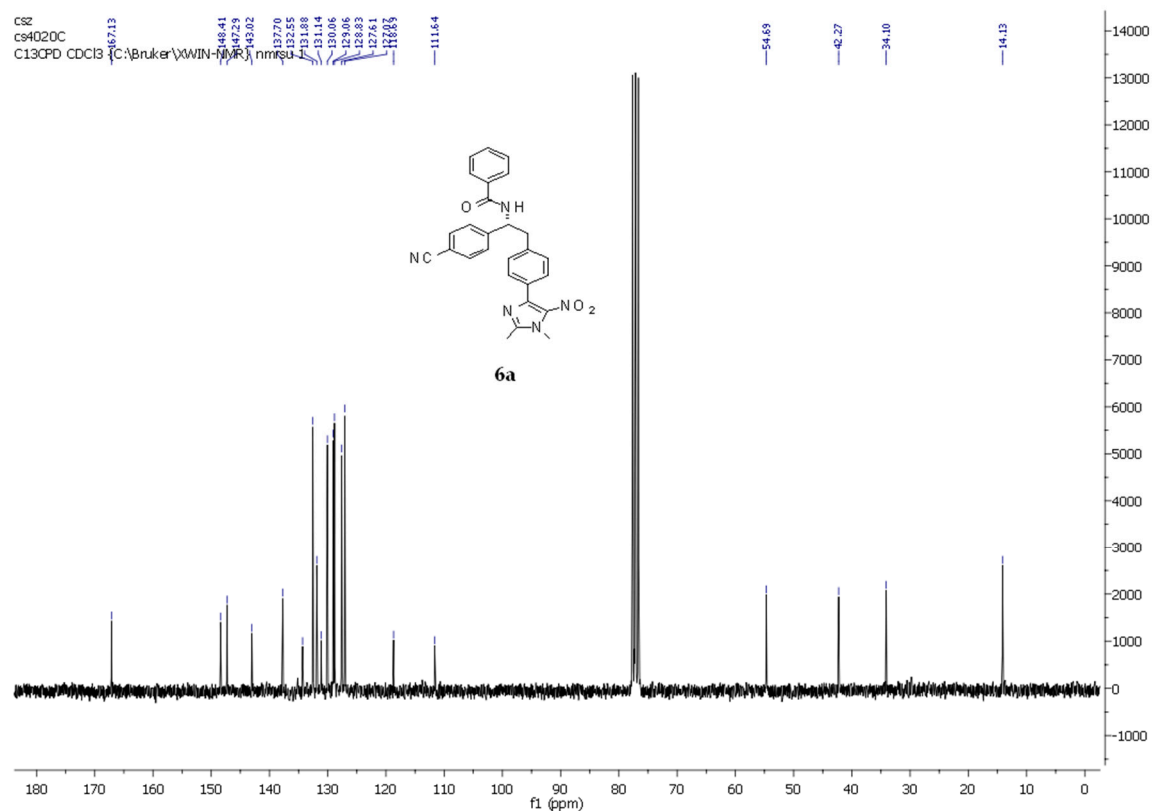Figure S6.  $^{13}\text{C}$ -NMR spectra of **6a**.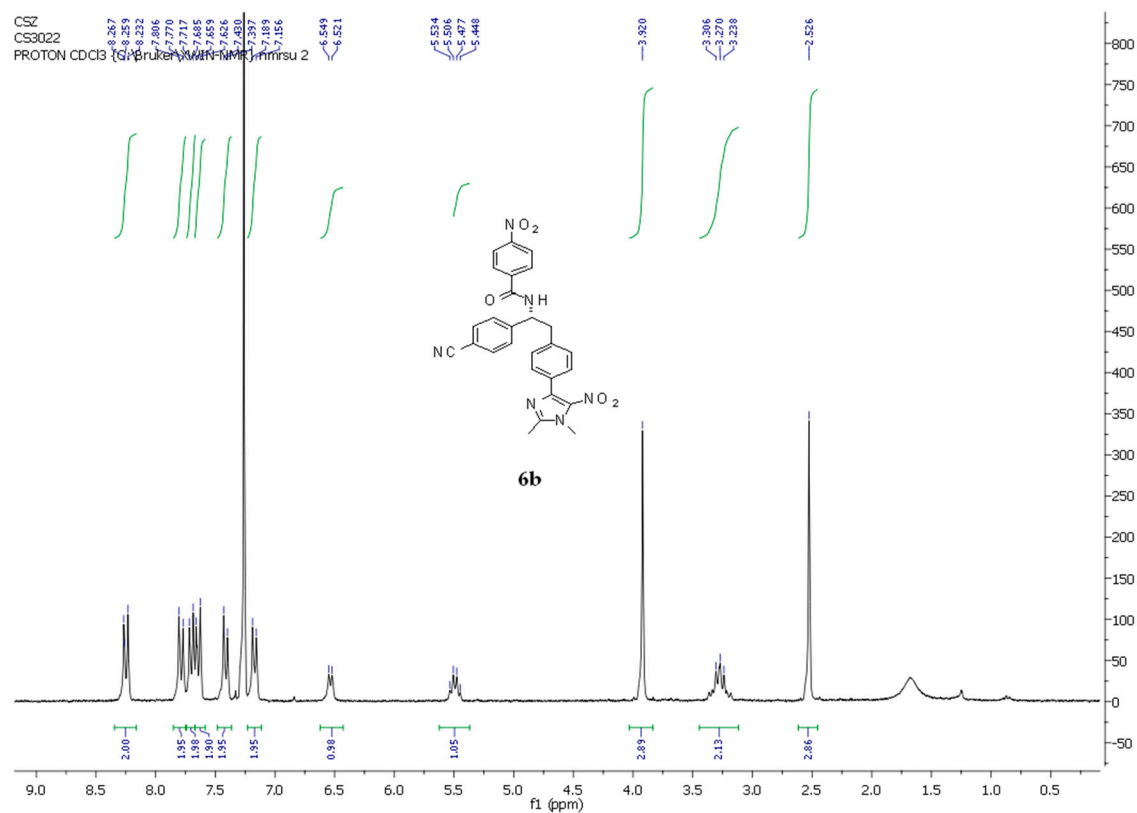Figure S7.  $^1\text{H}$ -NMR spectra of **6b**.

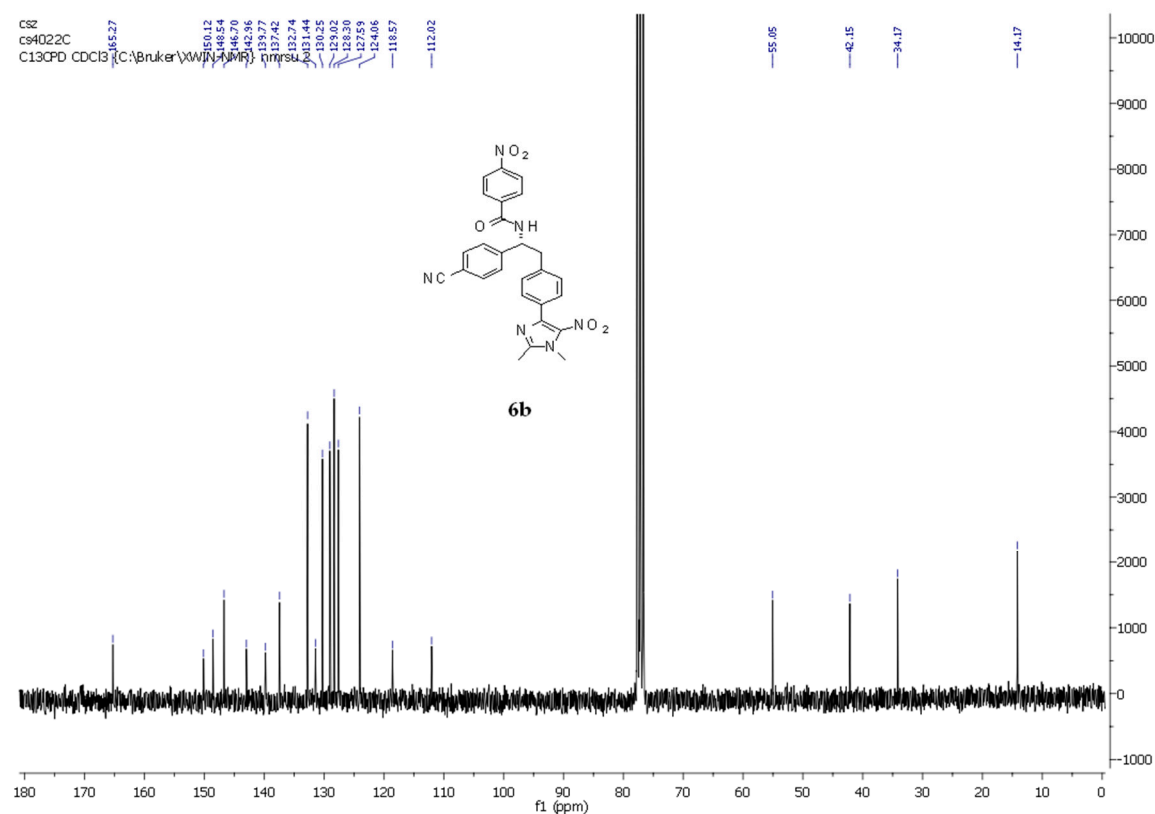Figure S8. <sup>13</sup>C-NMR spectra of **6b**.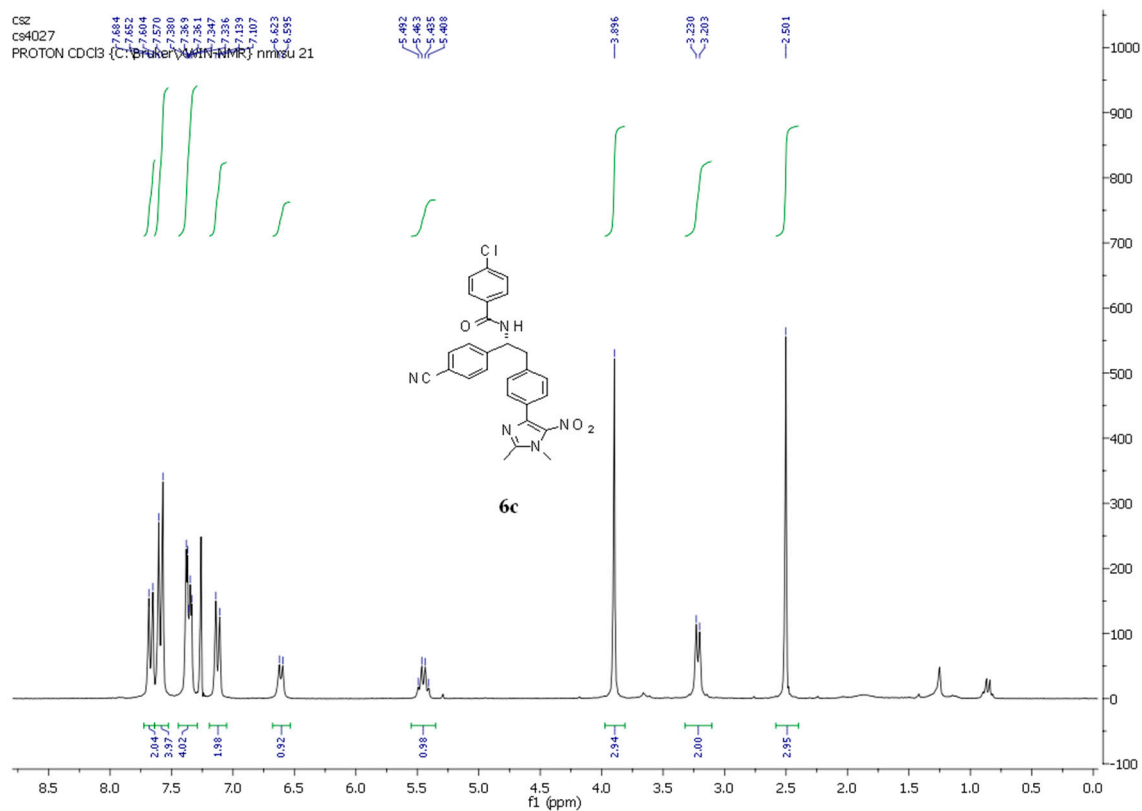Figure S9. <sup>1</sup>H-NMR spectra of **6c**.

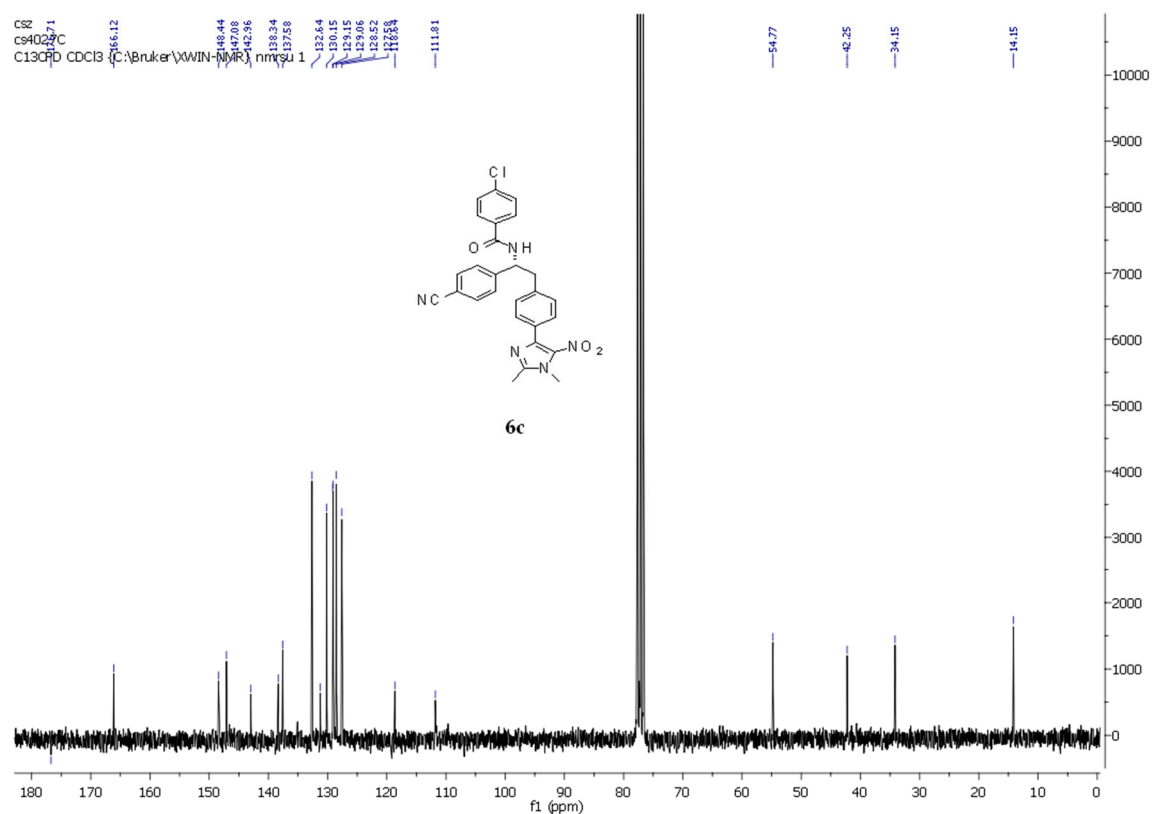

**Figure S10.**  $^{13}\text{C}$ -NMR spectra of **6c**.

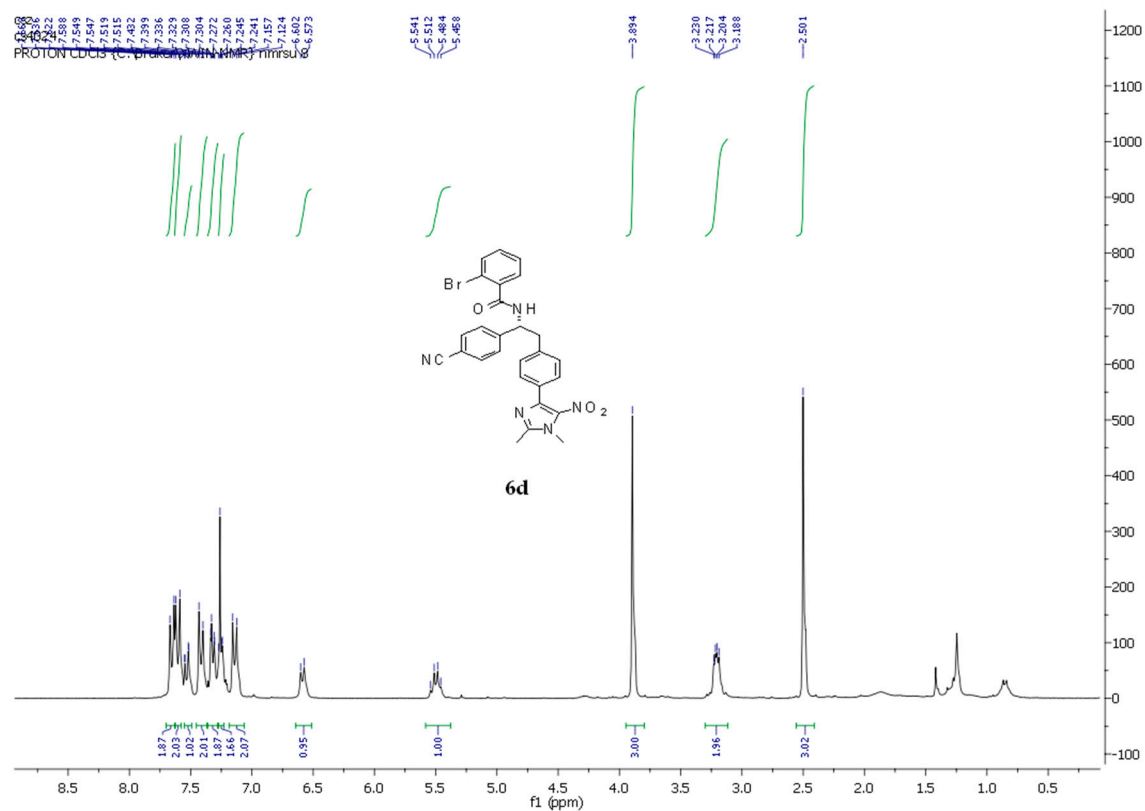

**Figure S11.**  $^1\text{H}$ -NMR spectra of **6d**.

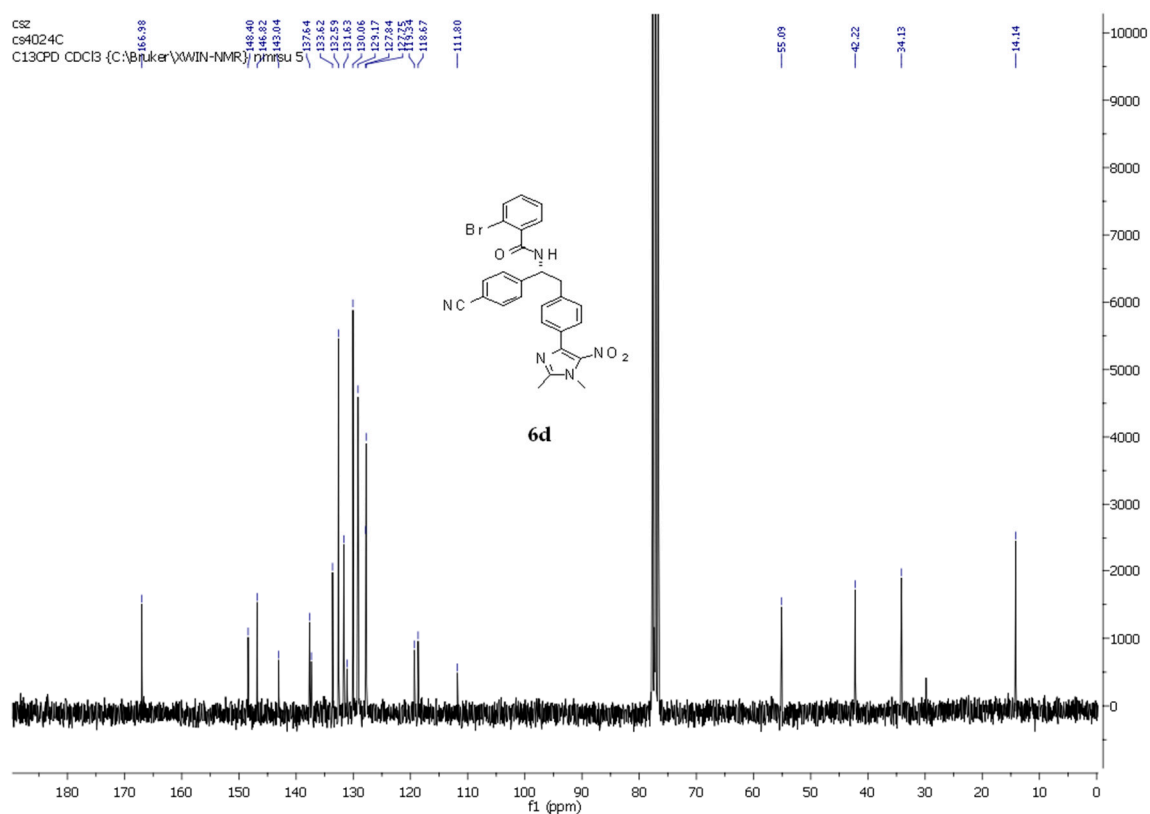Figure S12. <sup>13</sup>C-NMR spectra of **6d**.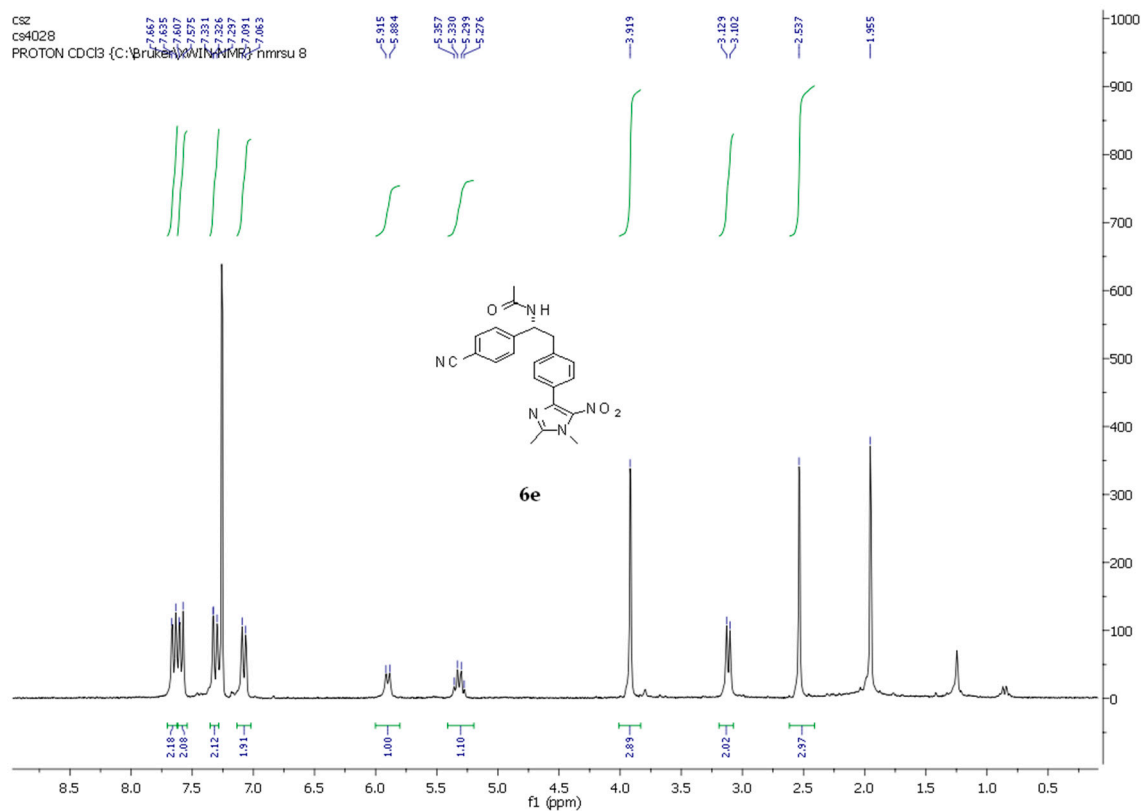Figure S13. <sup>1</sup>H-NMR spectra of **6e**.

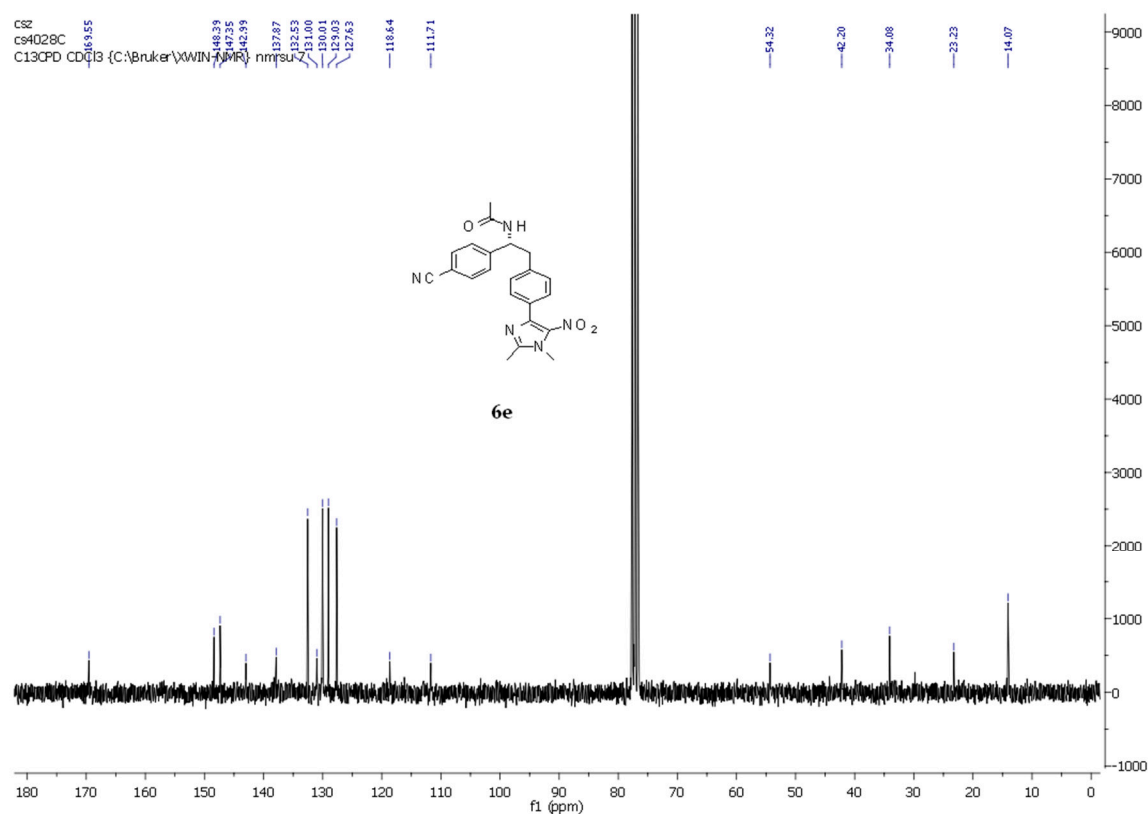Figure S14. <sup>13</sup>C-NMR spectra of 6e.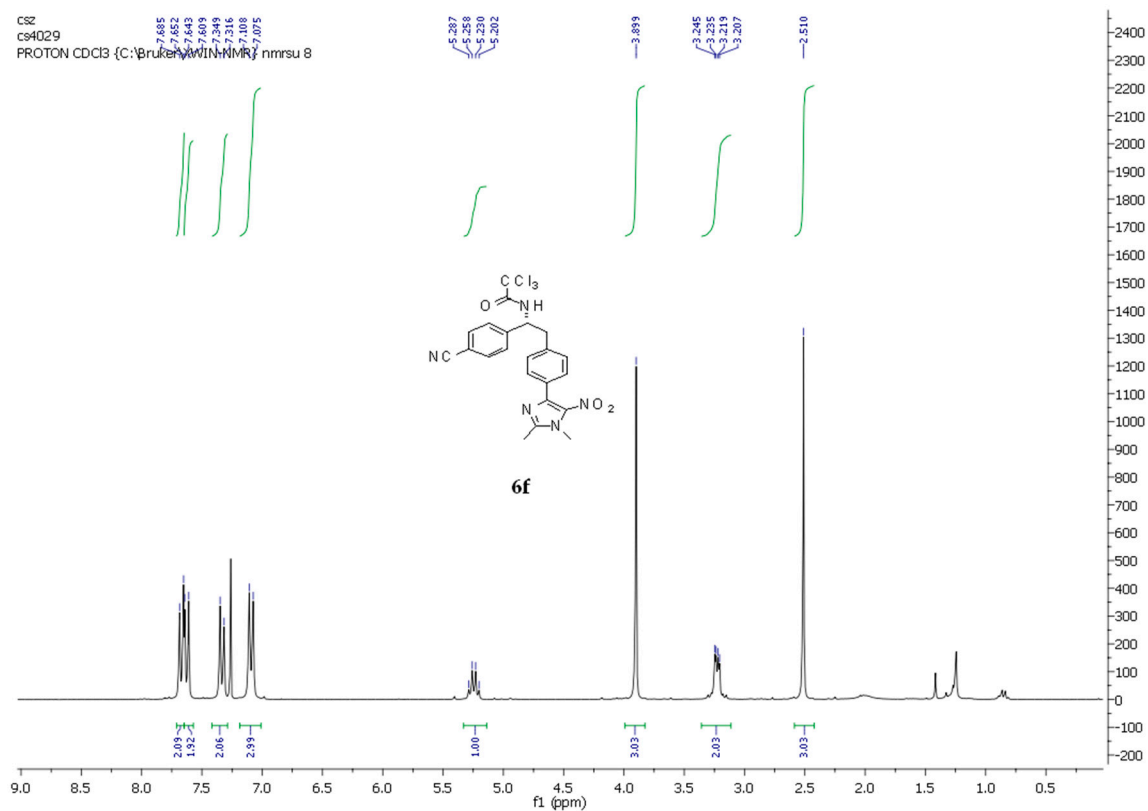Figure S15. <sup>1</sup>H-NMR spectra of 6f.

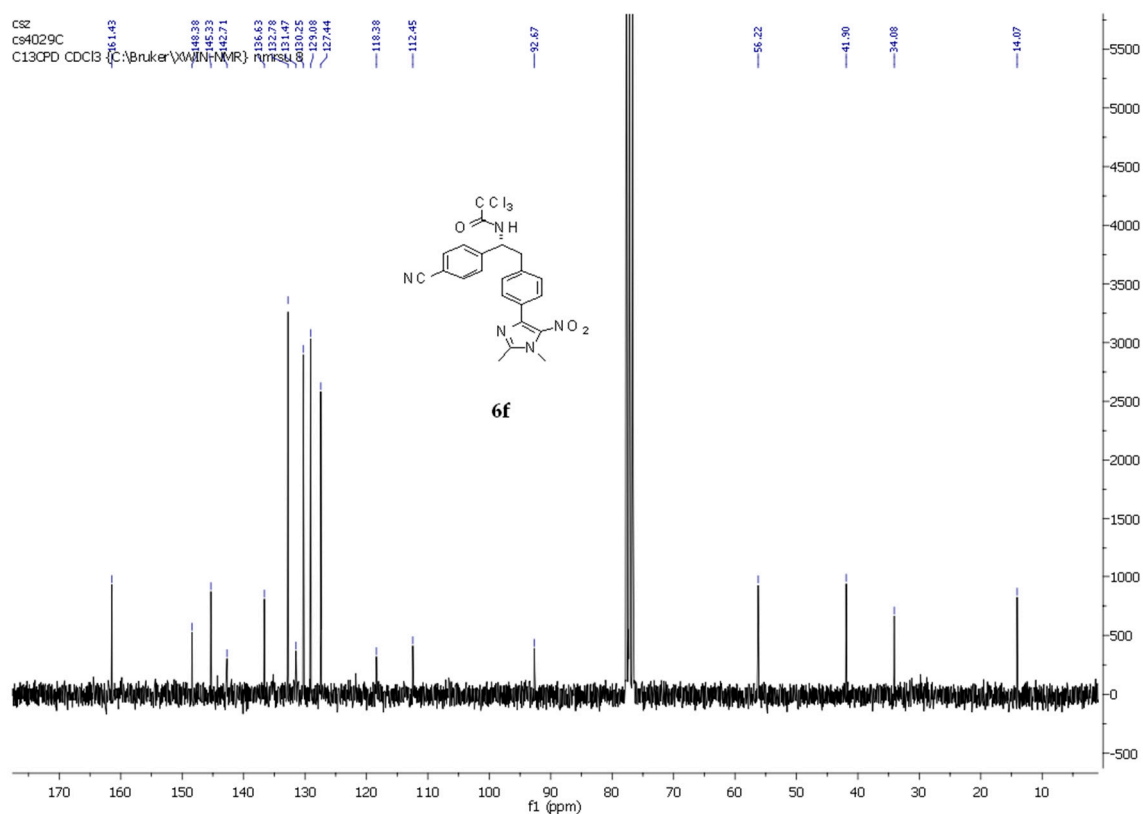Figure S16. <sup>13</sup>C-NMR spectra of **6f**.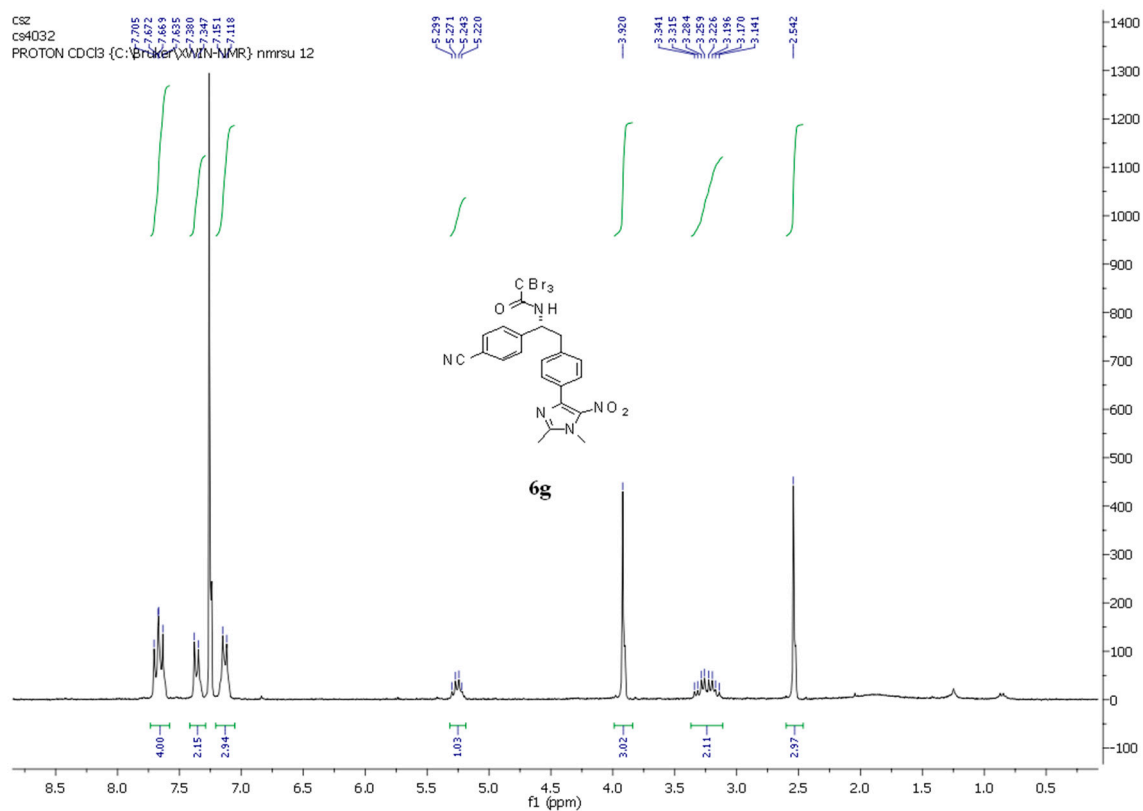Figure S17. <sup>1</sup>H-NMR spectra of **6g**.

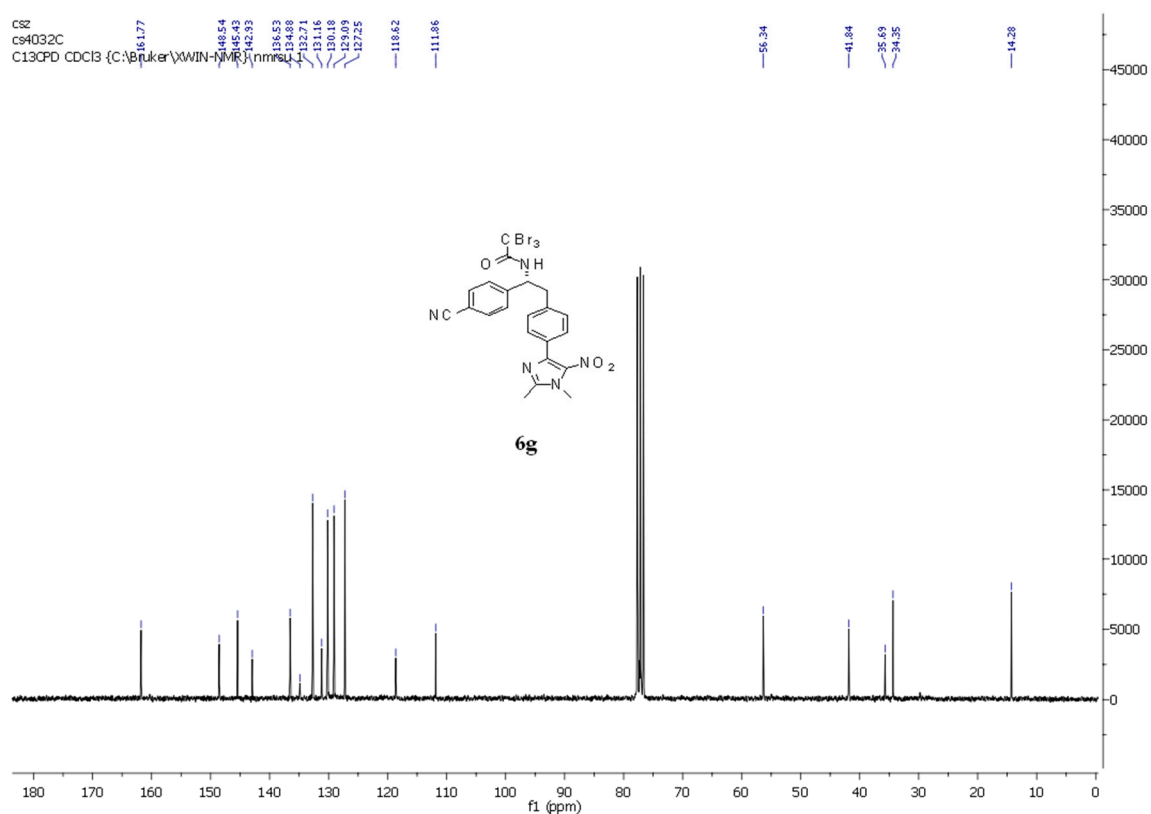Figure S18. <sup>13</sup>C-NMR spectra of **6g**.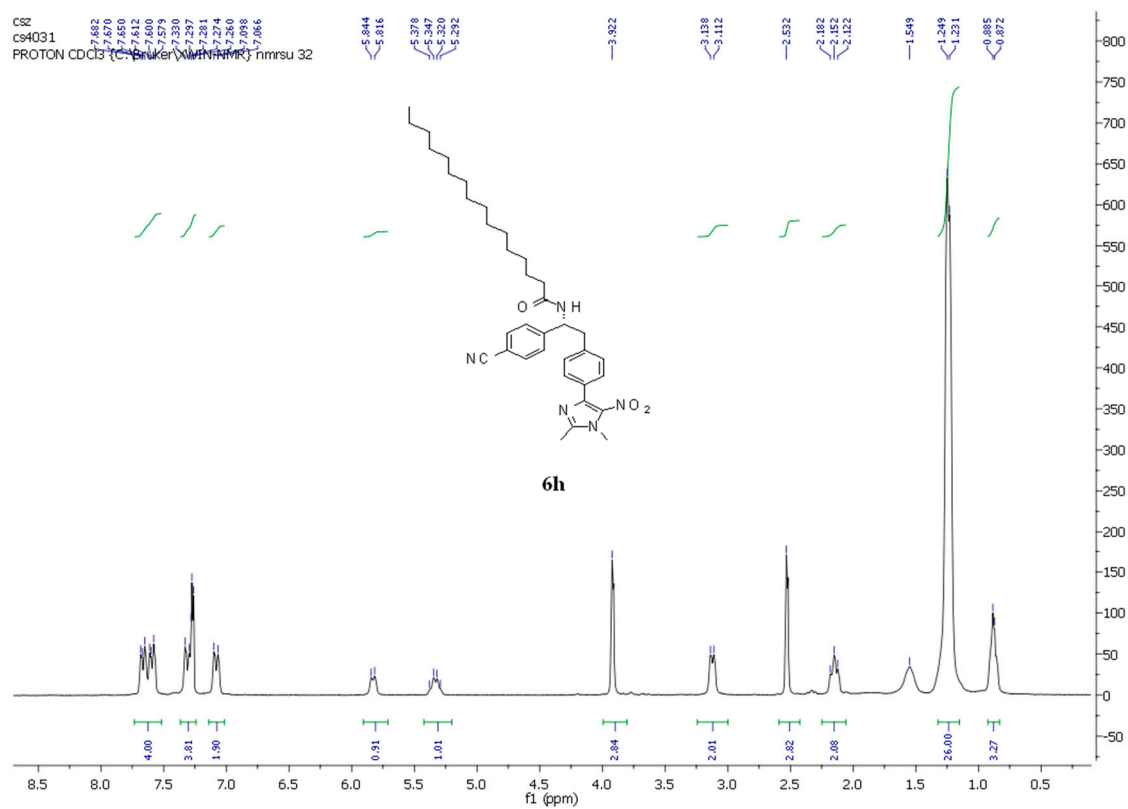Figure S19. <sup>1</sup>H-NMR spectra of **6h**.

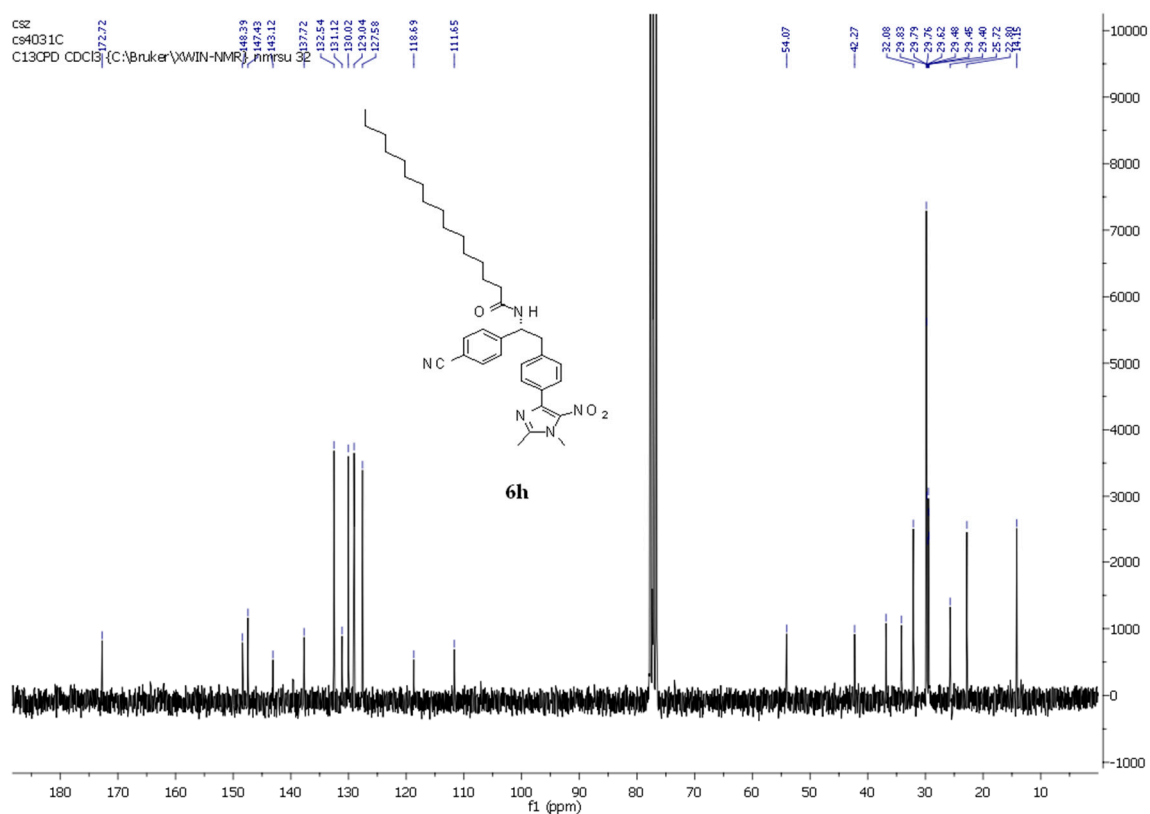Figure S20. <sup>13</sup>C-NMR spectra of **6h**.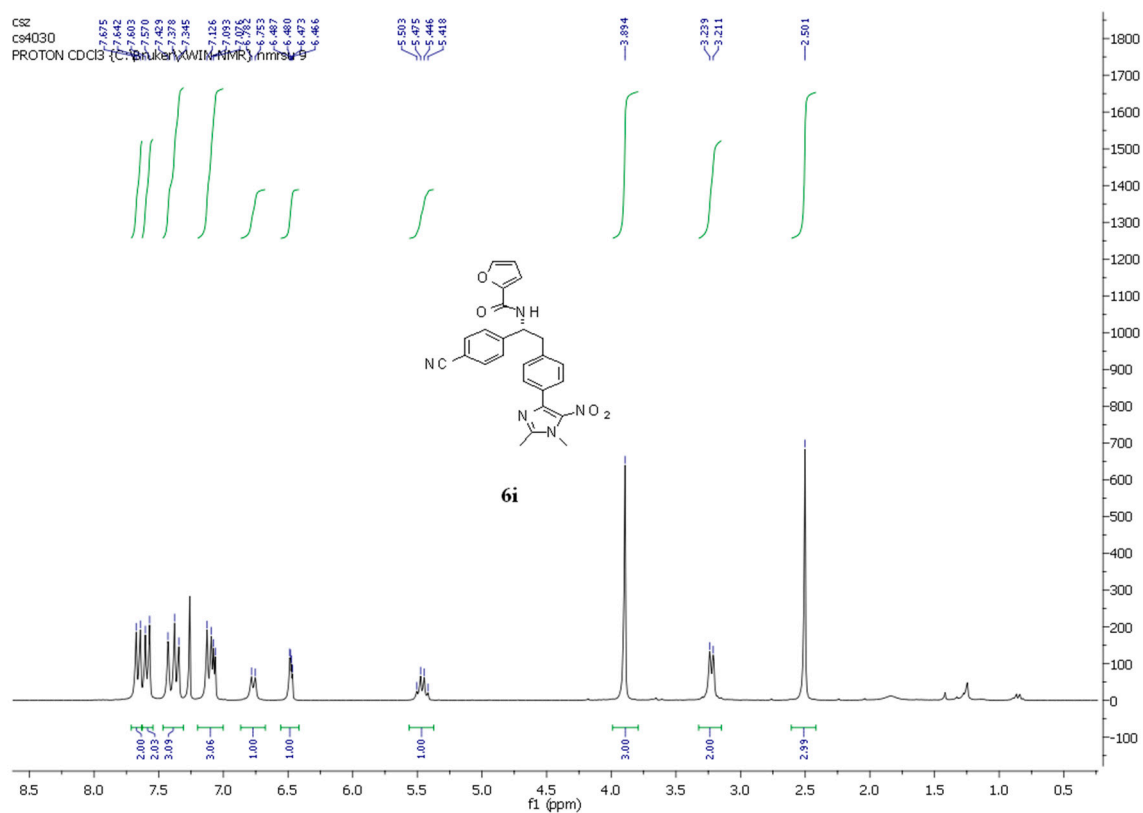Figure S21. <sup>1</sup>H-NMR spectra of **6i**.

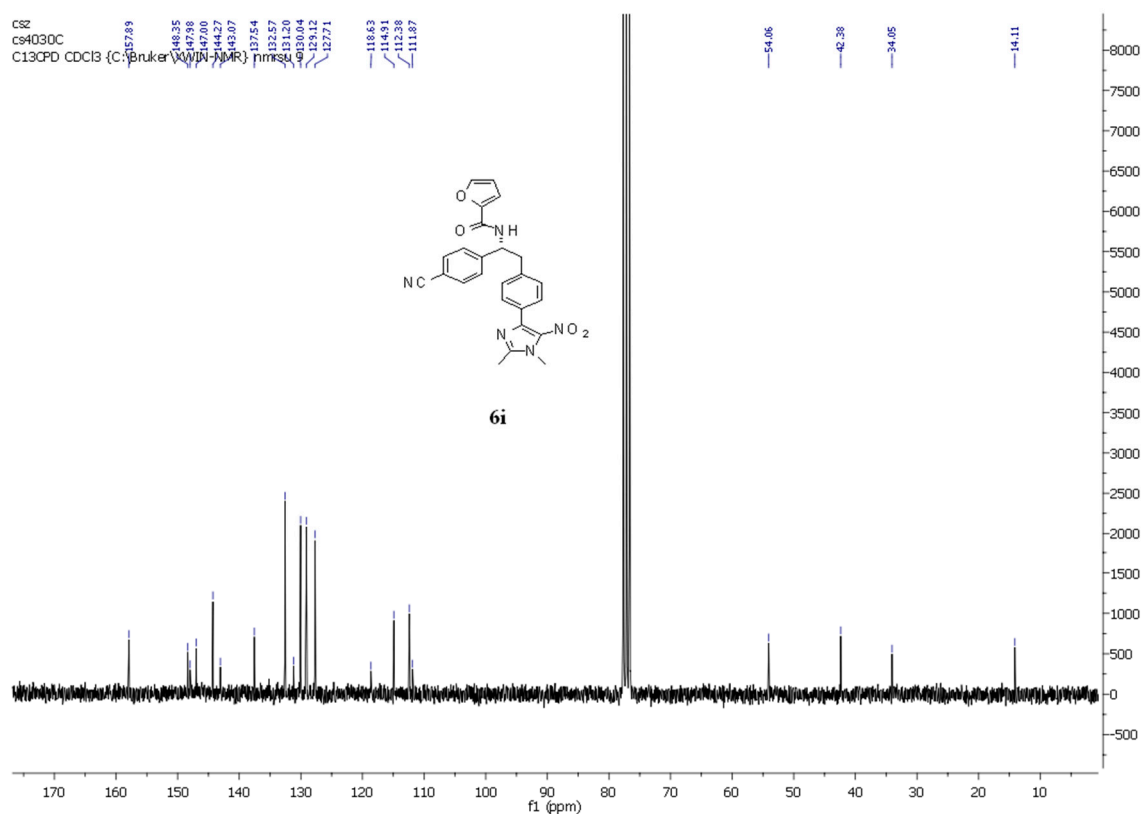Figure S22. <sup>13</sup>C-NMR spectra of 6i.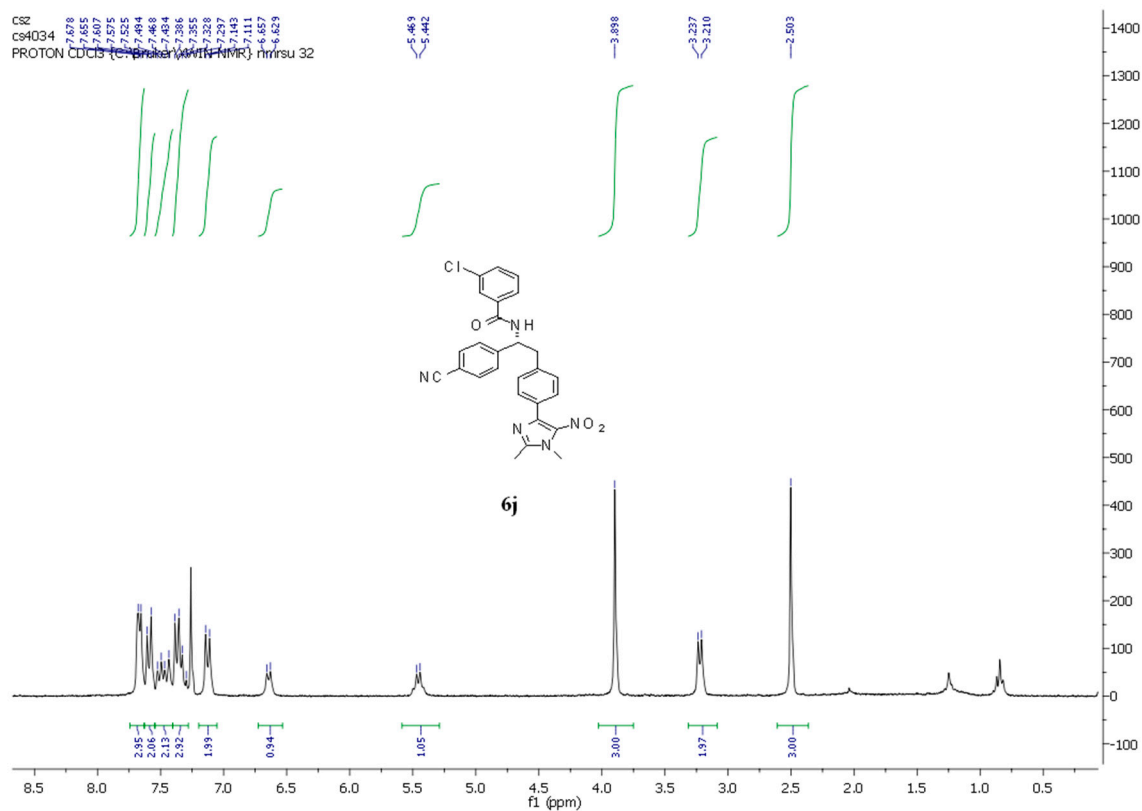Figure S23. <sup>1</sup>H-NMR spectra of 6j.

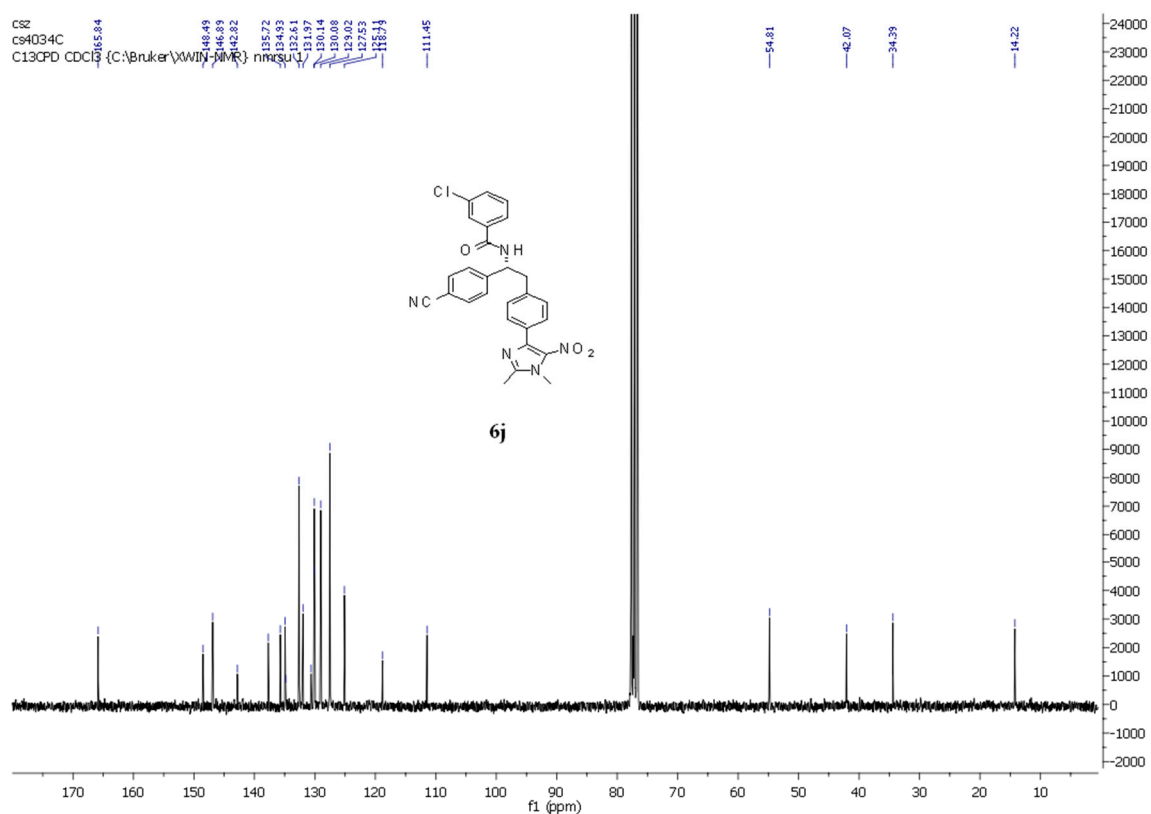Figure S24. <sup>13</sup>C-NMR spectra of **6j**.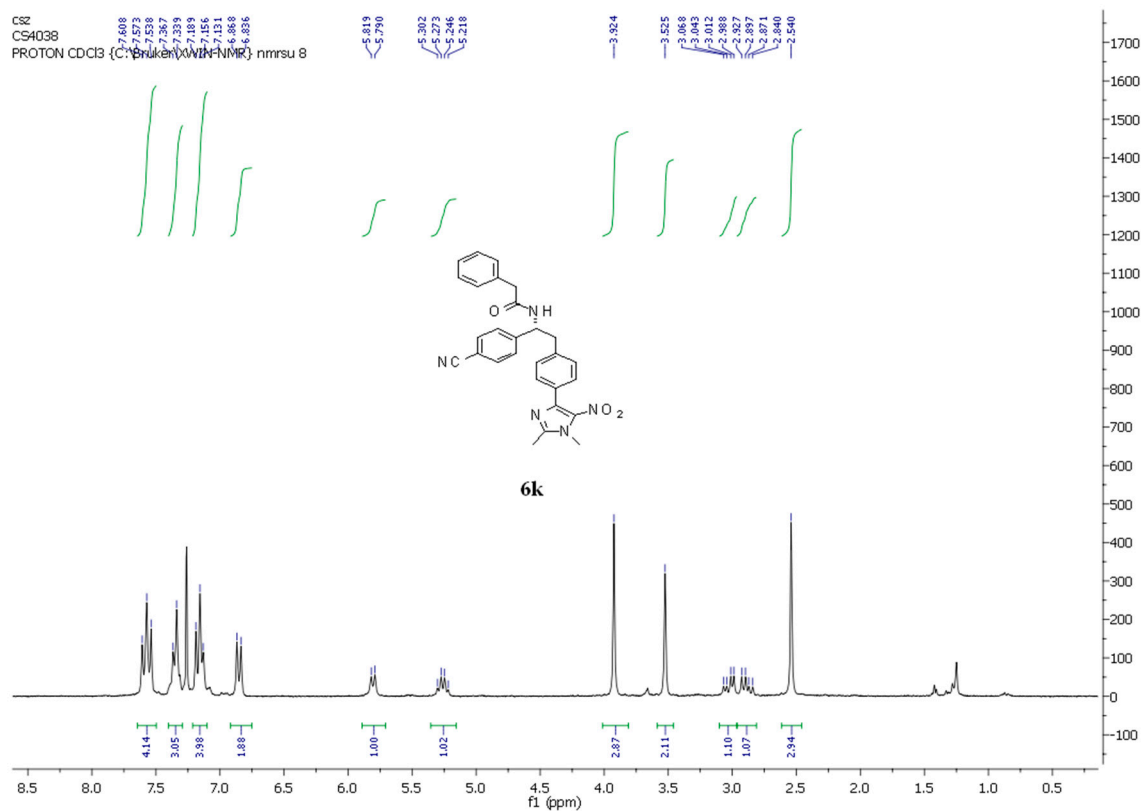Figure S25. <sup>1</sup>H-NMR spectra of **6k**.

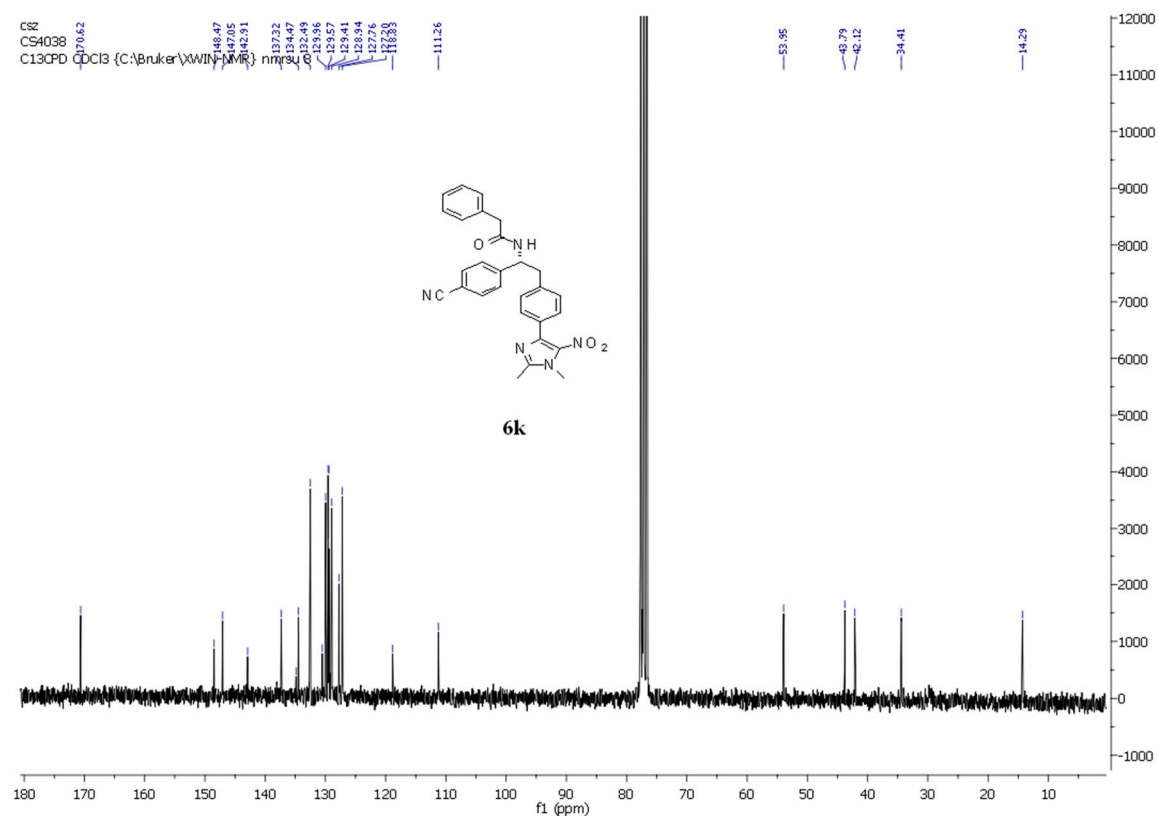Figure S26. <sup>13</sup>C-NMR spectra of 6k.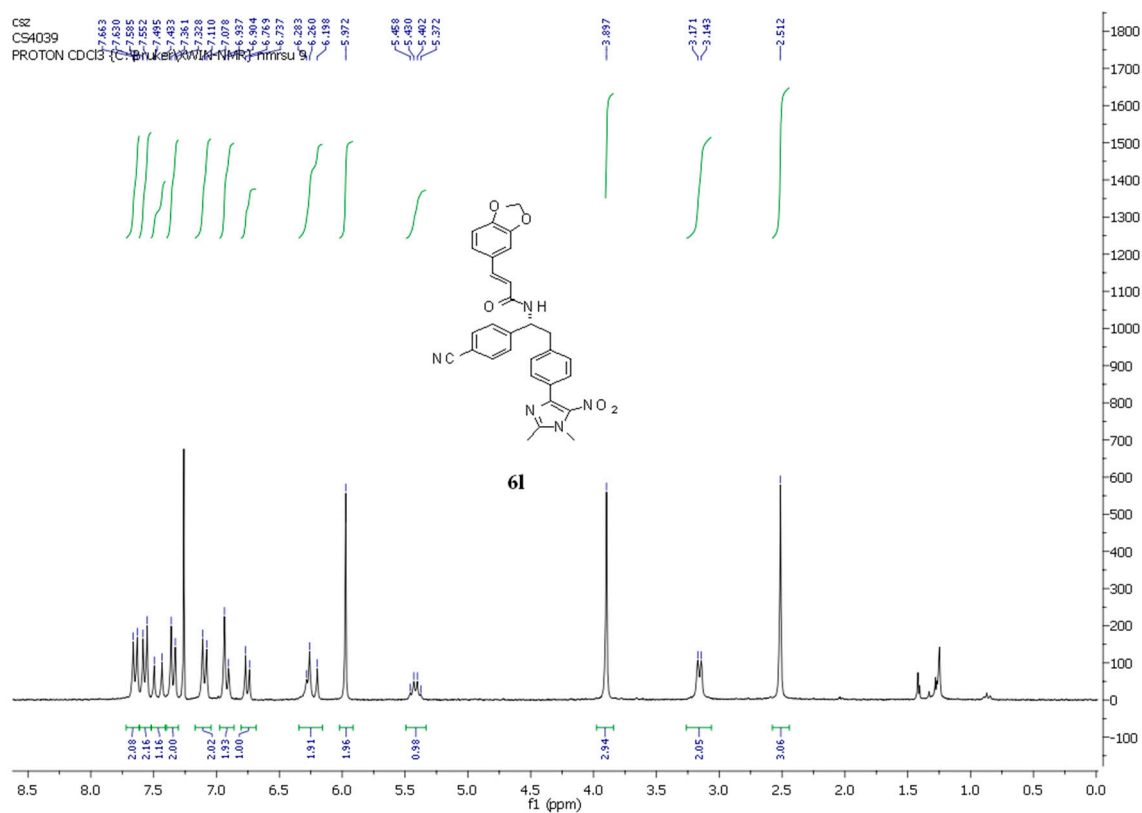Figure S27. <sup>1</sup>H-NMR spectra of 6l.

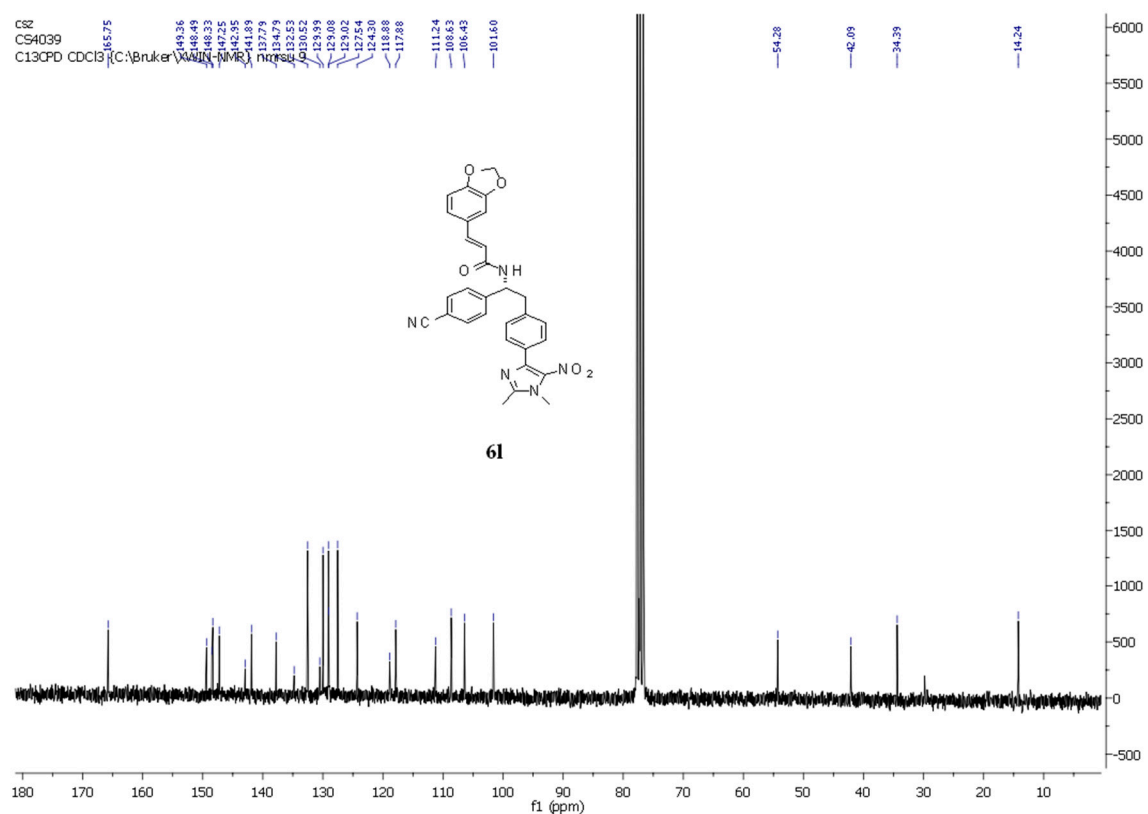Figure S28. <sup>13</sup>C-NMR spectra of 6l.

\\139.124.190.216\data\...\csal08

25/10/2016 12:21:59

RT: 0.00 - 8.00

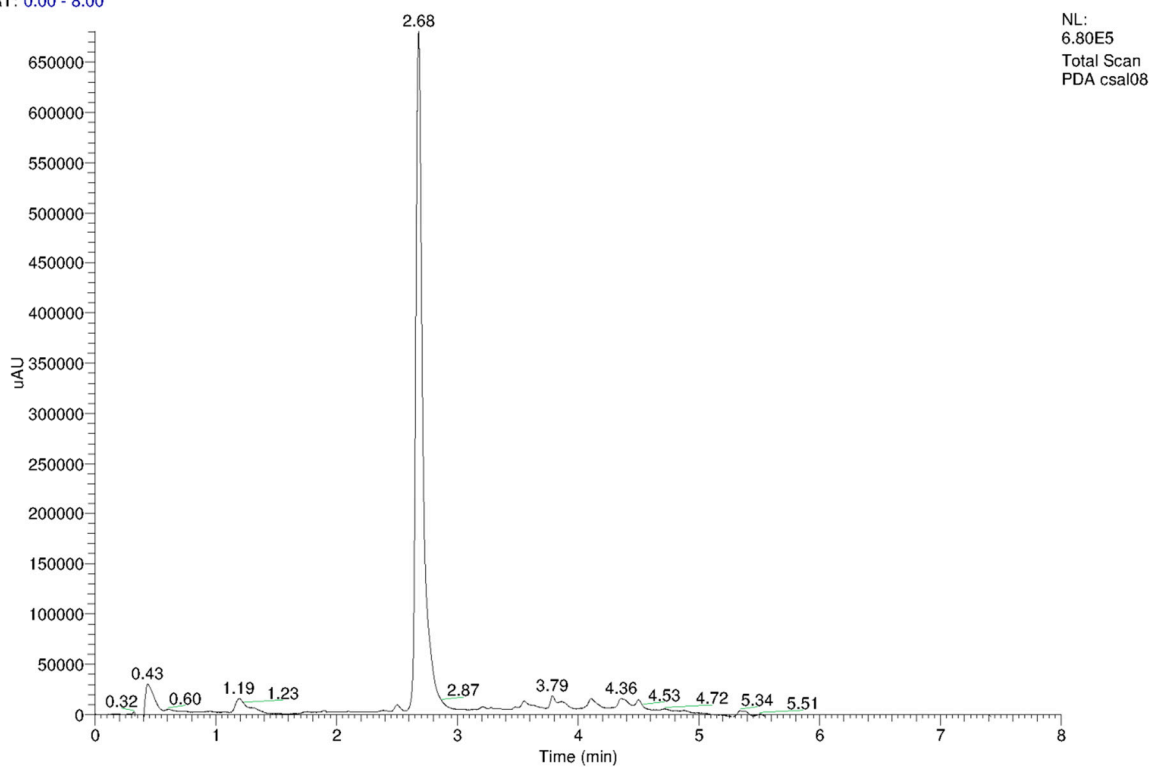

Figure S29. HPLC spectra of 3.

\\139.124.190.216\data\...\CS4019

26/10/2016 10:42:00

RT: 0.00 - 8.00

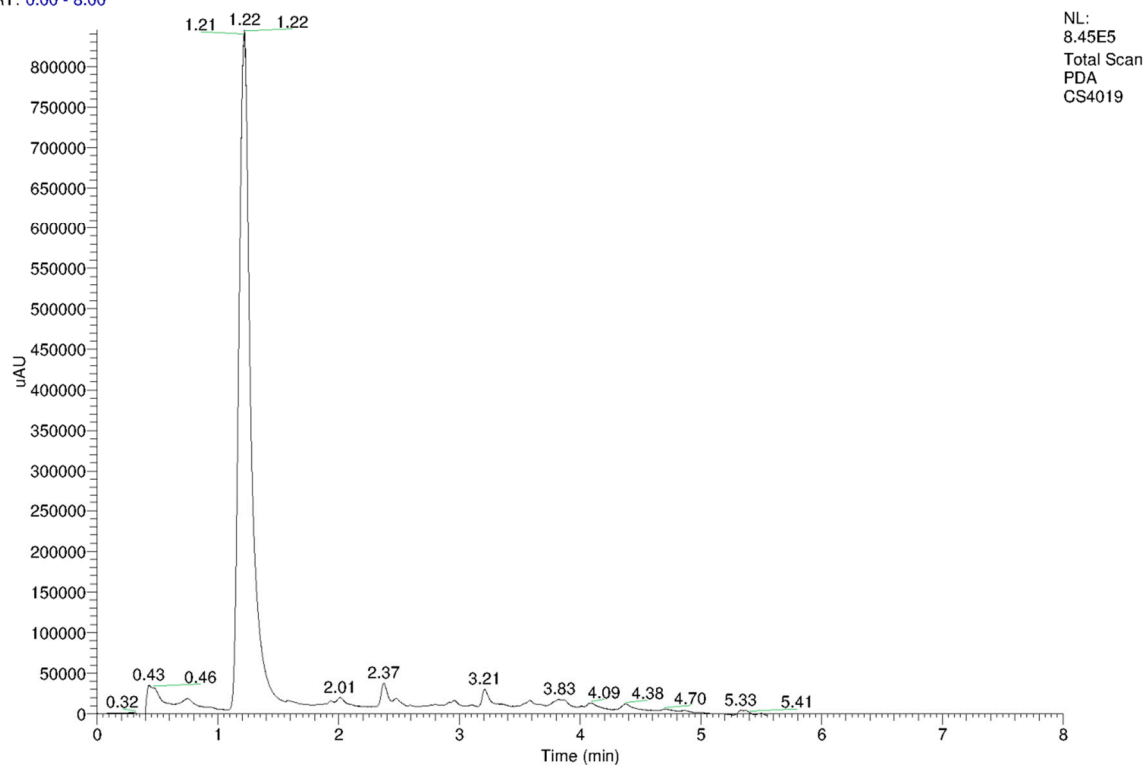

Figure S30. HPLC spectra of 4.

\\139.124.190.216\data\...\cs4020

25/10/2016 10:31:01

RT: 0.00 - 8.00

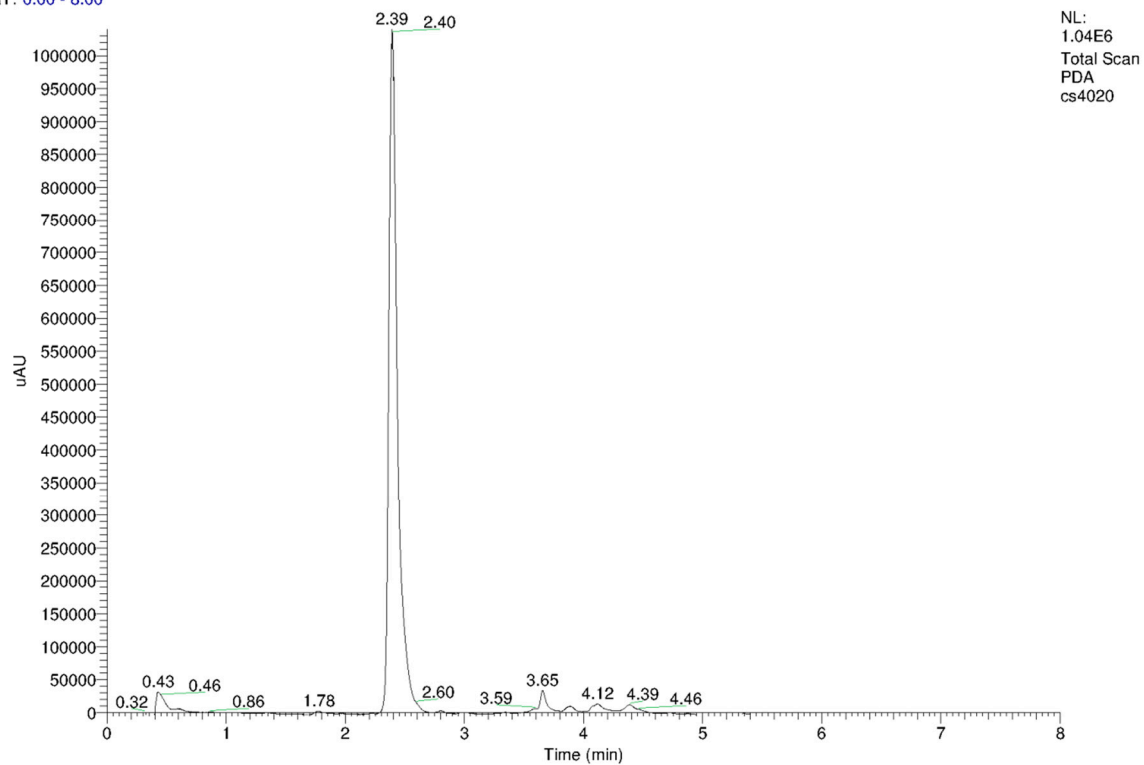

Figure S31. HPLC spectra of 6a.

\\139.124.190.216\data\...\cs4022

25/10/2016 10:40:10

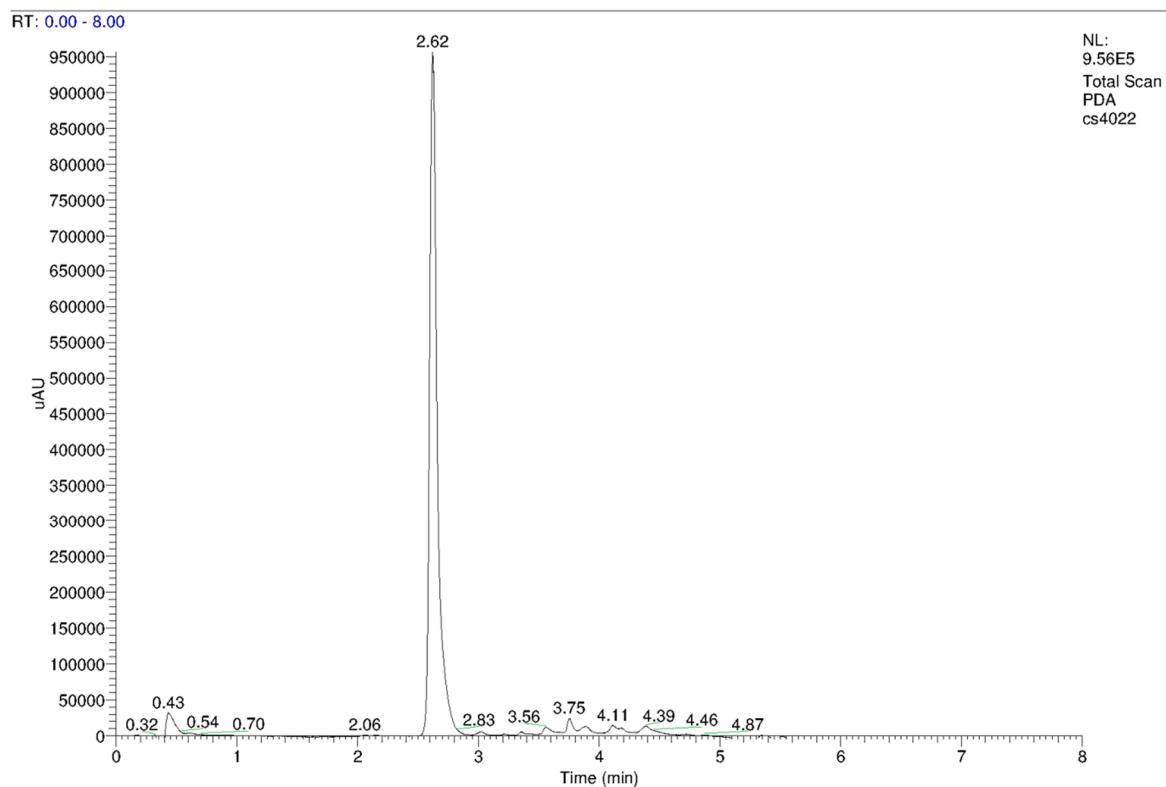

Figure S32. HPLC spectra of 6b.

\\139.124.190.216\data\...\cs4027

25/10/2016 11:35:47

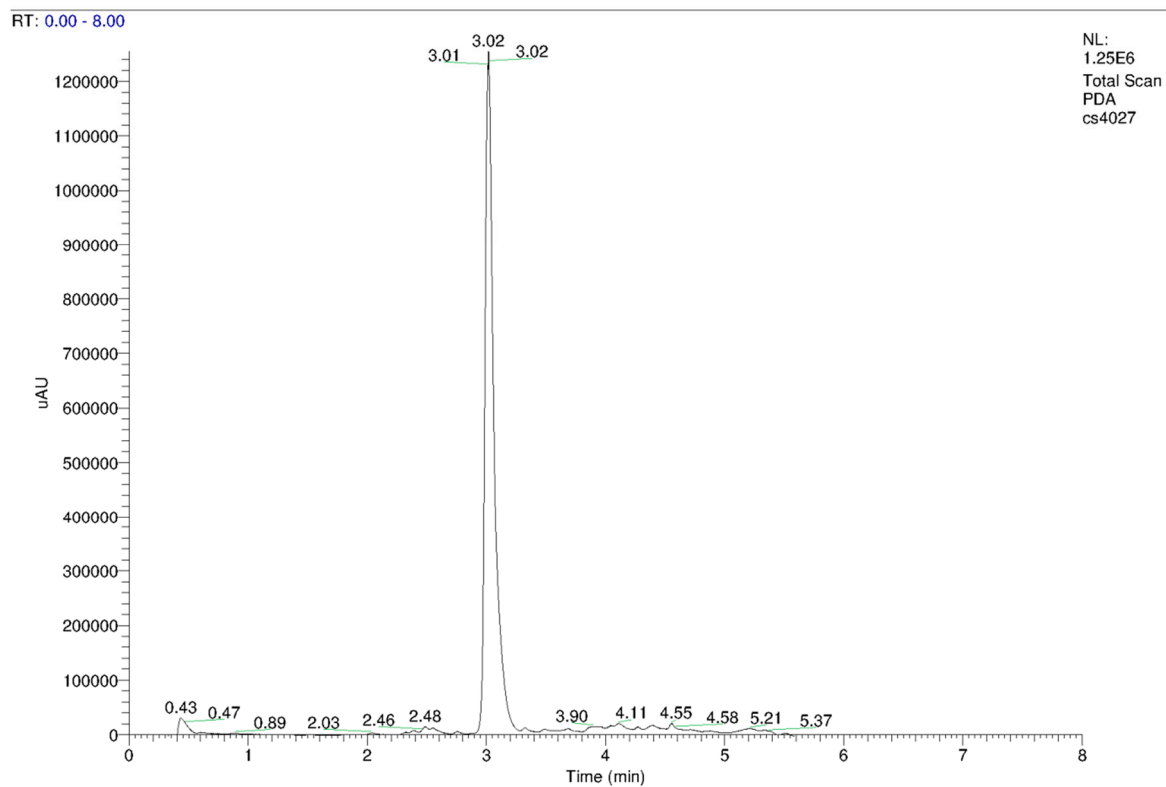

Figure S33. HPLC spectra of 6c.

\\139.124.190.216\data\...\cs4024

25/10/2016 10:49:28

RT: 0.00 - 8.00

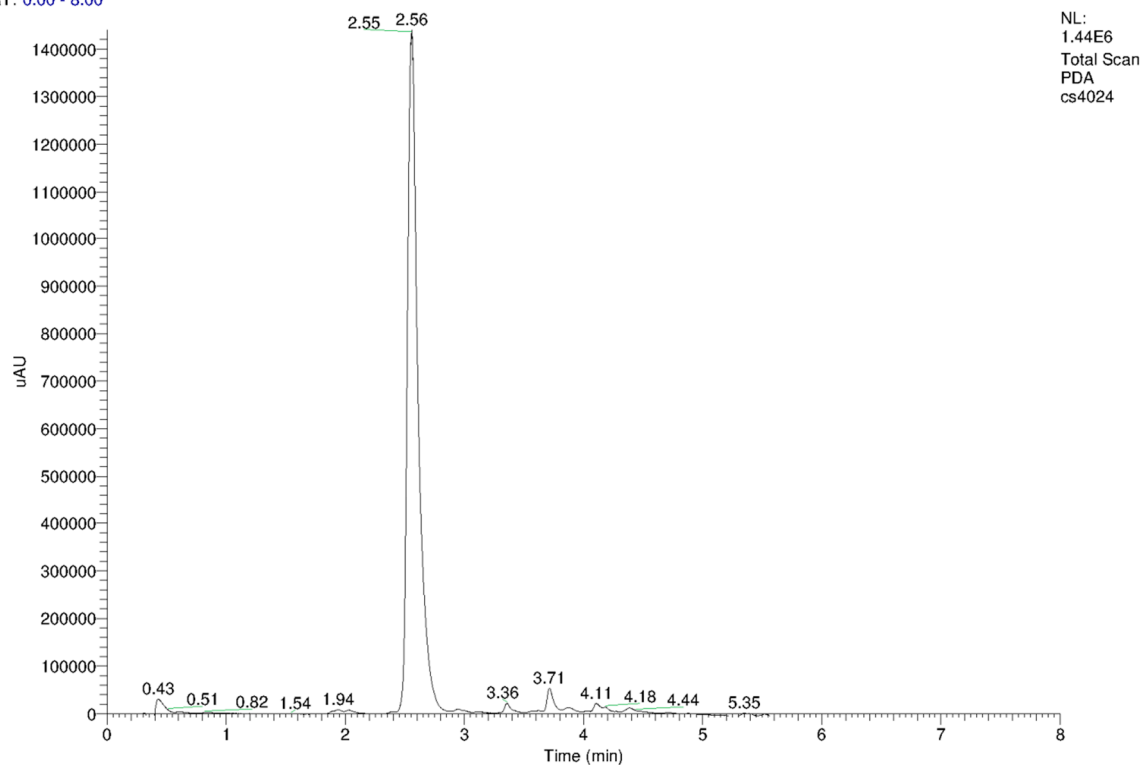

Figure S34. HPLC spectra of 6d.

\\139.124.190.216\data\...\cs4028

25/10/2016 11:45:04

RT: 0.00 - 8.00

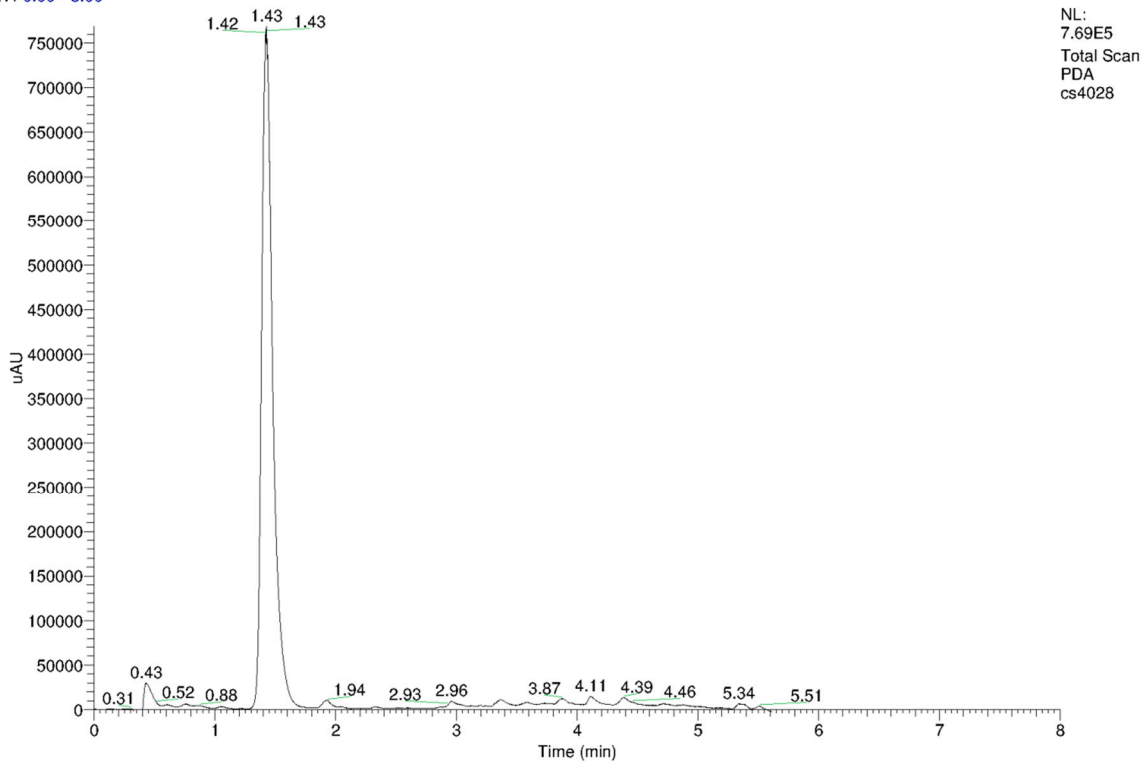

Figure S35. HPLC spectra of 6e.

\\139.124.190.216\data\...\cs4029

25/10/2016 11:54:12

RT: 0.00 - 8.00

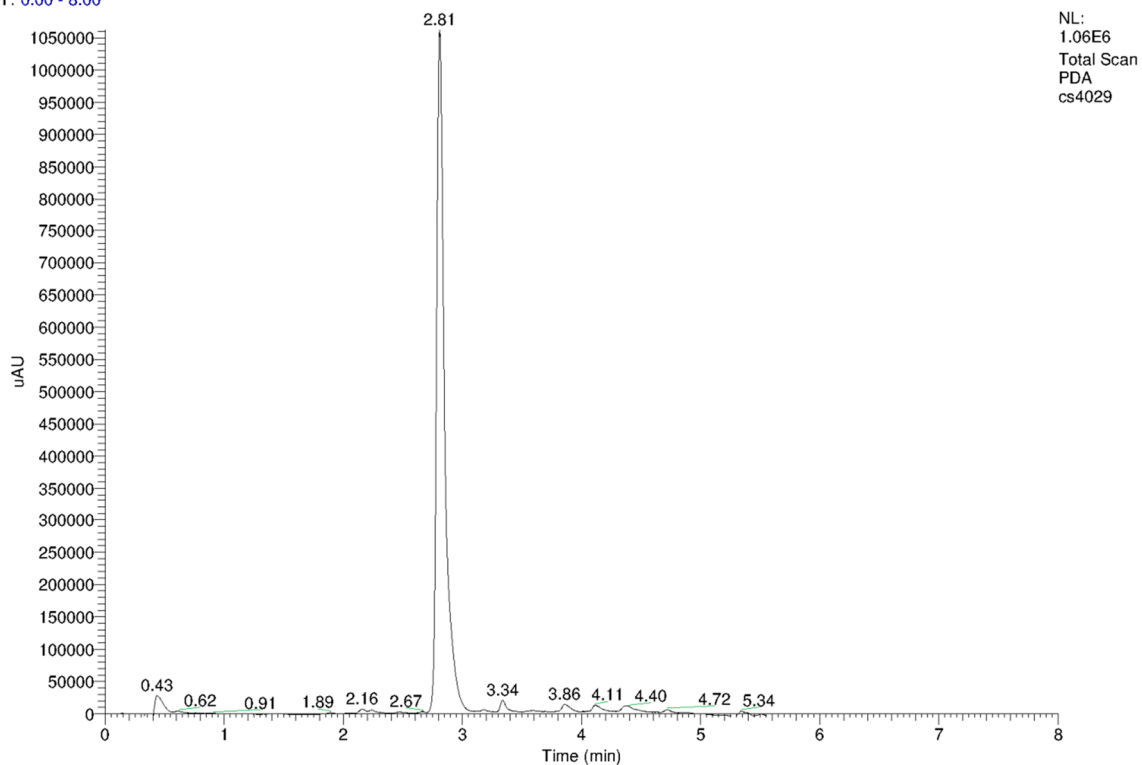

Figure S36. HPLC spectra of 6f.

\\139.124.190.216\data\...\cs4032

25/10/2016 12:49:40

RT: 0.00 - 8.00

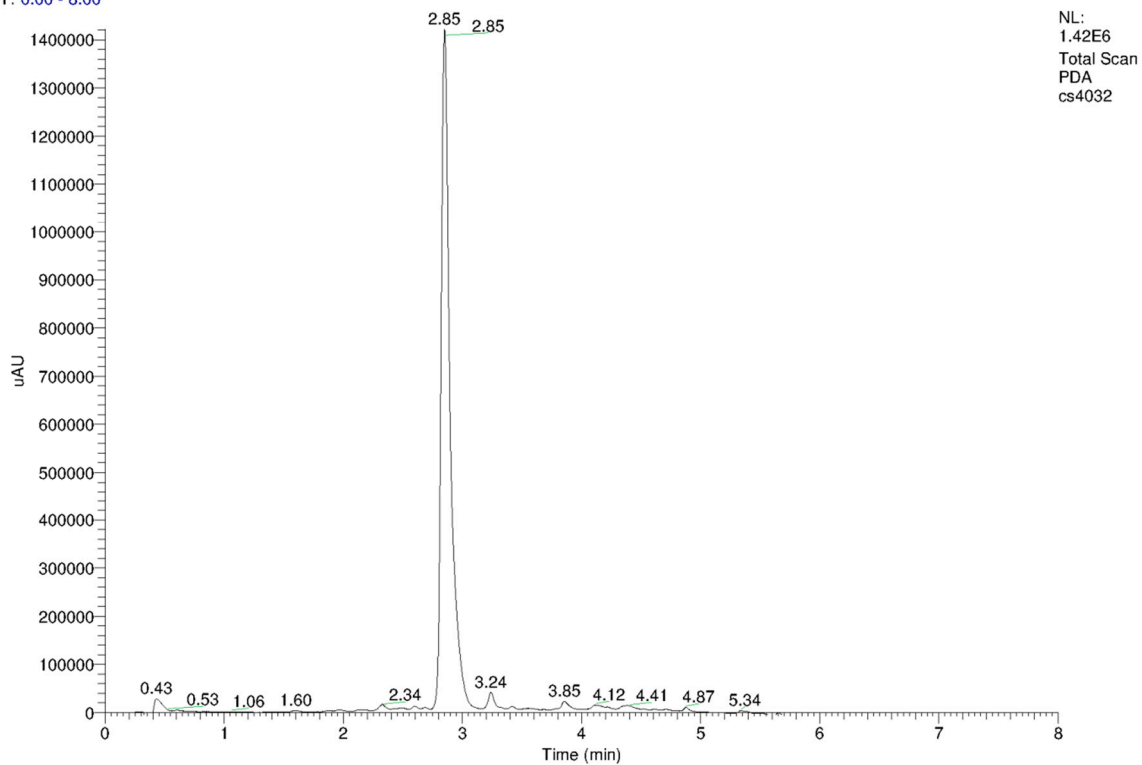

Figure S37. HPLC spectra of 6g.

\\139.124.190.216\data\...\cs4031

25/10/2016 12:40:32

RT: 0.00 - 8.00

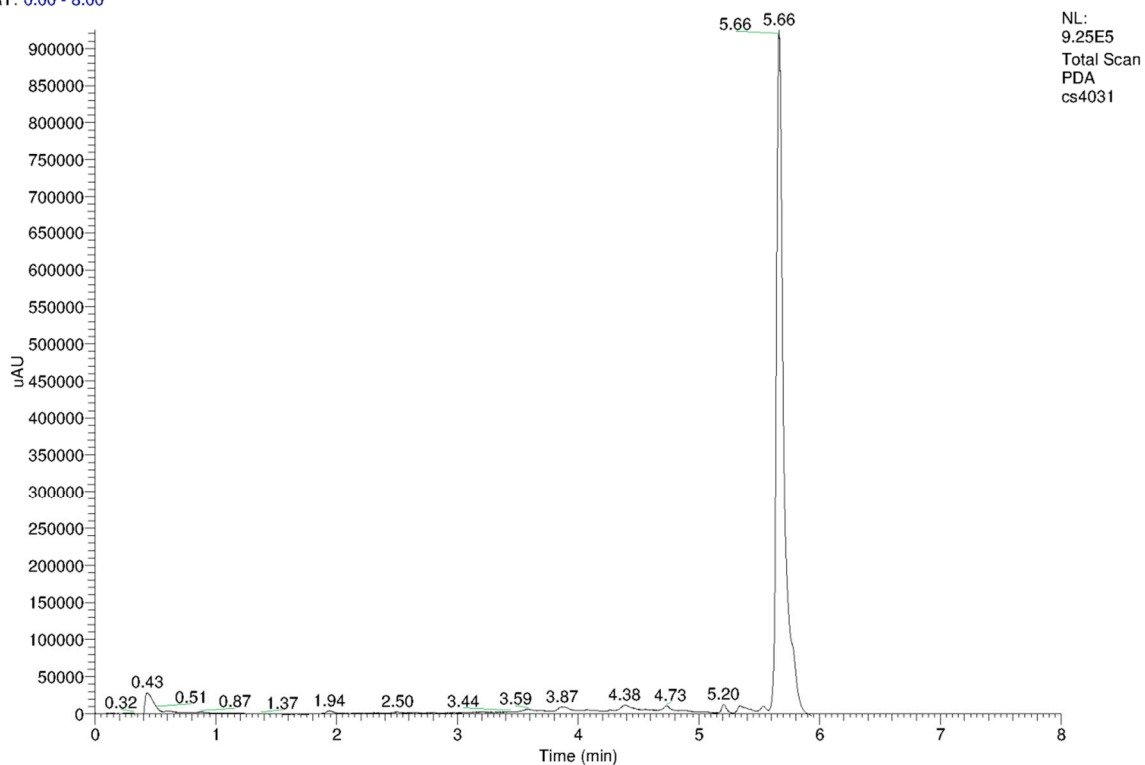

Figure S38. HPLC spectra of 6h.

\\139.124.190.216\data\...\cs4030

25/10/2016 12:31:16

RT: 0.00 - 8.00

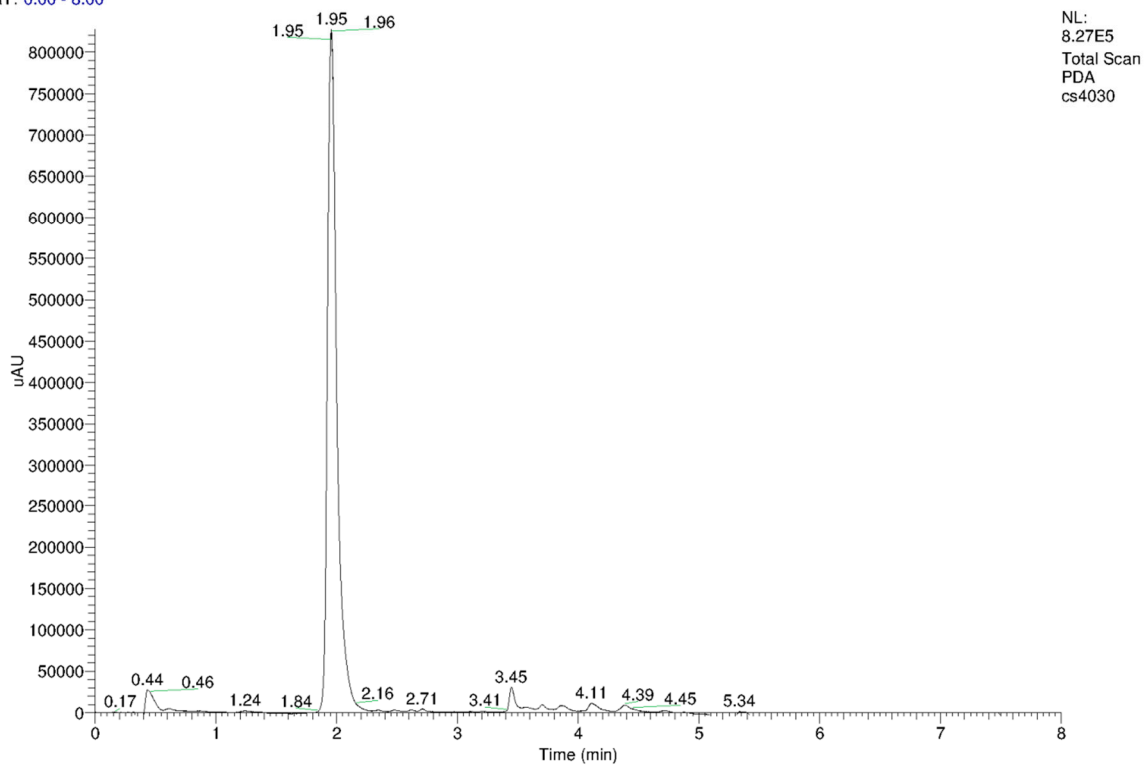

Figure S39. HPLC spectra of 6i.

\\139.124.190.216\data\...\cs4034

25/10/2016 12:58:50

RT: 0.00 - 8.00

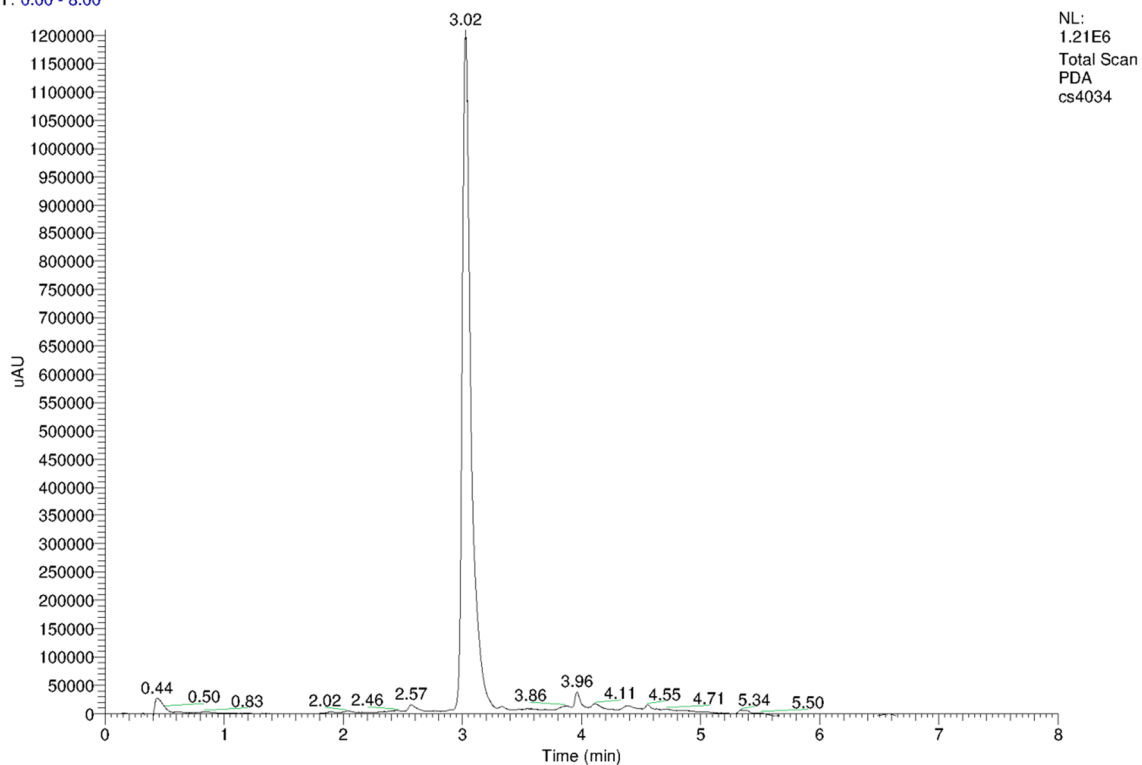

Figure S40. HPLC spectra of 6j.

\\139.124.190.216\data\...\cs4038

25/10/2016 13:08:06

RT: 0.00 - 8.00

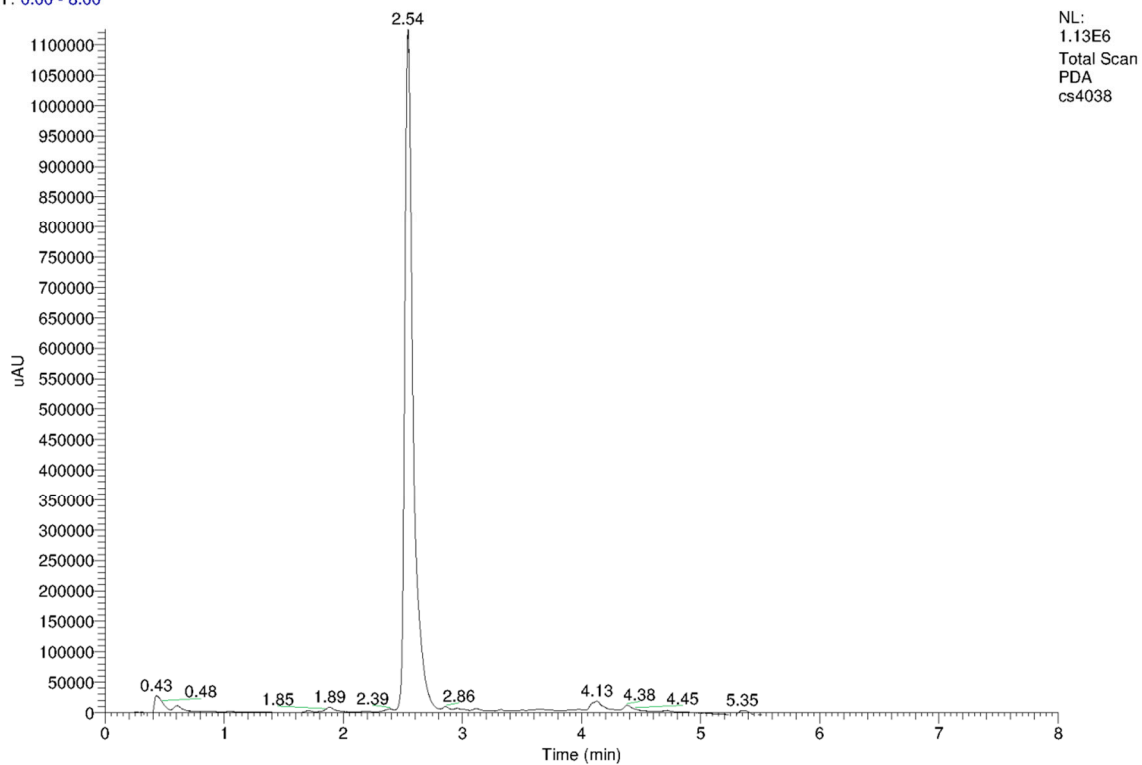

Figure S41. HPLC spectra of 6k.

\\139.124.190.216\data\...\cs4039

25/10/2016 13:17:16

RT: 0.00 - 8.00

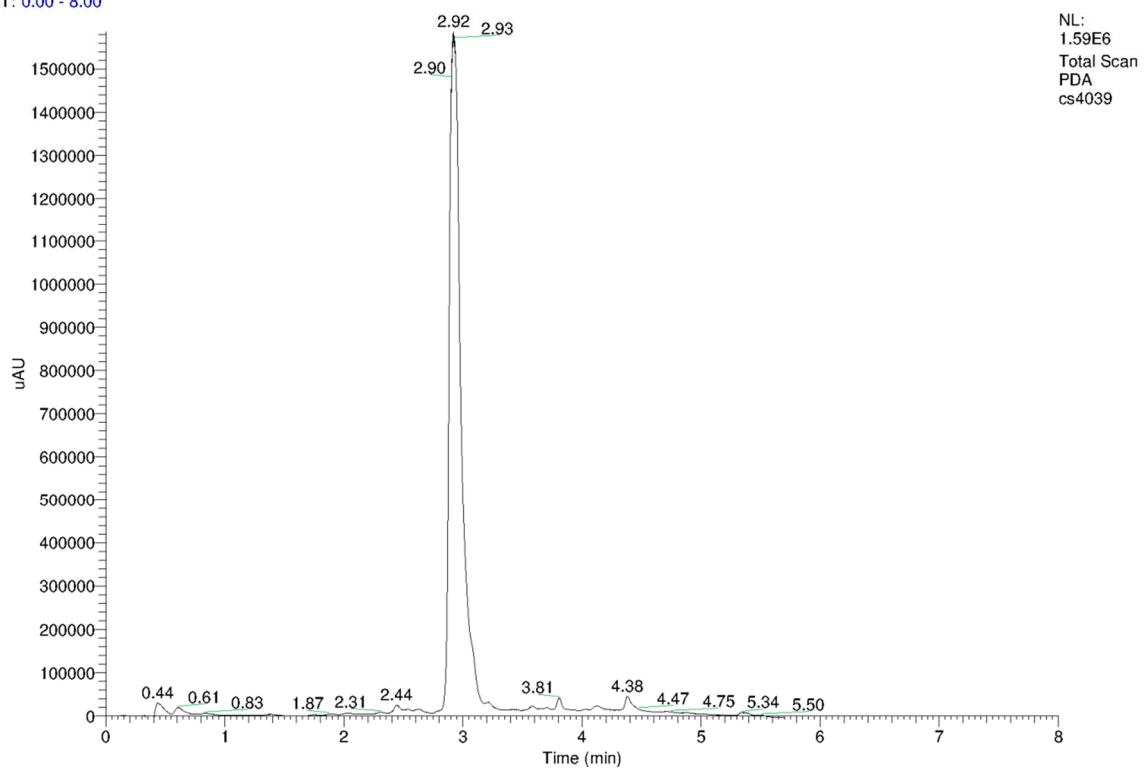

Figure S42. HPLC spectra of 6l.
